# Supplementary material
Source: PubMed Central journal article supplement (PMC6963915)
Supplement: ao9b02181_si_001.pdf [file ao9b02181_si_001.pdf]

## Supporting Information

### Development of Rhodamine 6G Based Fluorescent Chemosensors for Al<sup>3+</sup> Ion Detection: Effect of Ring Strain and Substituent in Enhancing Its Sensing Performance

Jayanta Mandal,<sup>a</sup> Pravat Ghorai,<sup>a</sup> Kunal Pal,<sup>b</sup> Tanurima Bhaumik,<sup>a</sup> Parimal Karmakar<sup>b</sup> and Amrita Saha<sup>\*a</sup>

<sup>a</sup>Department of Chemistry, Jadavpur University, Kolkata- 700032, India.

E-mail: [asaha@chemistry.jdvu.ac.in](mailto:asaha@chemistry.jdvu.ac.in); [amritasahachemju@gmail.com](mailto:amritasahachemju@gmail.com); Tel. +91-33-24572146

<sup>b</sup>Department of Life Science and Biotechnology, Jadavpur University, Kolkata-700032, India.

| Sl. No. | Contents                                                                                                                                                                                                                                           | Page No. |
|---------|----------------------------------------------------------------------------------------------------------------------------------------------------------------------------------------------------------------------------------------------------|----------|
| 1       | <b>Figure S1-S4.</b> ESI-mass spectrum of chemosensors ( <b>H<sub>3</sub>L1- H<sub>3</sub>L4</b> ).                                                                                                                                                | S3-S4    |
| 2       | <b>Figure S5.</b> FTIR spectra of chemosensors ( <b>(a) H<sub>3</sub>L1, (b) H<sub>3</sub>L2, (c) H<sub>3</sub>L3 and (d) H<sub>3</sub>L4.</b>                                                                                                     | S5       |
| 3       | <b>Figure S6-S9.</b> ESI-mass spectrum of complexes <b>1-4</b> .                                                                                                                                                                                   | S5-S7    |
| 4       | <b>Figure S10.</b> FTIR spectra of ( <b>a</b> ) complex 1, ( <b>b</b> ) complex 2, ( <b>c</b> ) complex 3 and ( <b>d</b> ) complex 4.                                                                                                              | S7       |
| 5       | <b>Figure S11-S14.</b> <sup>1</sup> H-NMR of the chemosensor ( <b>H<sub>3</sub>L1- H<sub>3</sub>L4</b> ) in DMSO- <i>d</i> <sub>6</sub> recorded on a 400 MHz Bruker NMR spectrometer.                                                             | S8-S9    |
| 6       | <b>Figure S15-S18.</b> <sup>1</sup> H-NMR of the complexes <b>1-4</b> in DMSO- <i>d</i> <sub>6</sub> recorded on a 400 MHz Bruker NMR spectrometer                                                                                                 | S10-S11  |
| 7       | <b>Figure S19-S22.</b> <sup>13</sup> C NMR spectrum of <b>H<sub>3</sub>L1- H<sub>3</sub>L4</b> in DMSO- <i>d</i> <sub>6</sub> .                                                                                                                    | S12-S13  |
| 8       | <b>Figure S23-S26.</b> <sup>13</sup> C NMR spectrum of complexes <b>1-4</b> in DMSO- <i>d</i> <sub>6</sub>                                                                                                                                         | S14-S15  |
| 9       | <b>Figure S27-S29.</b> Absorption titration study of <b>H<sub>3</sub>L2- H<sub>3</sub>L4</b> (10 μM) with gradual addition of Al <sup>3+</sup> ions, 0-11 μM in 10 mM HEPES buffer at pH 7.4.                                                      | S16-S17  |
| 10      | <b>Figure S30-S33.</b> 1:1 binding stoichiometry has shown by Job's plot of complexes <b>1-4</b> . Symbols and solid lines represent the experimental and simulated profiles, respectively.                                                        | S17-S19  |
| 11      | <b>Figure S34-S36.</b> Fluorescence titration of <b>H<sub>3</sub>L2- H<sub>3</sub>L4</b> (10 μM) in 10 mM HEPES buffer at pH =7.4 by successive addition of Al <sup>3+</sup> (0-11 μM) with λ <sub>em</sub> = 555 nm (1/1 slit).                   | S19-S20  |
| 12      | <b>Figure S37.</b> Pictorial representation of spirolactam ring opening in presence of Al <sup>3+</sup> ions.                                                                                                                                      | S21      |
| 13      | <b>Figure S38-S41.</b> Benesi-Hildebrand plot for complexes <b>1-4</b> . The plot is obtained after adding 10 μM Al <sup>3+</sup> solution to the <b>H<sub>3</sub>L1- H<sub>3</sub>L4</b> solution (10 μM) (in 10 mM HEPES buffer medium, pH 7.4). | S21-S23  |
| 14      | <b>Figure S42-S45.</b> Fluorescence titration of <b>H<sub>3</sub>L4</b> (10 μM) in THF solvent by gradual addition of Al <sup>3+</sup> (0-11 μM) with λ <sub>ex</sub> = 490 nm and corresponding Benesi-Hildebrand                                 | S23-S25  |

|    |                                                                                                                                                                                                                                               |         |
|----|-----------------------------------------------------------------------------------------------------------------------------------------------------------------------------------------------------------------------------------------------|---------|
|    | plot.                                                                                                                                                                                                                                         |         |
| 15 | <b>Figure S46-S49.</b> Relative fluorescence intensity diagram of chemosensors ( <b>H<sub>3</sub>L1-H<sub>3</sub>L4</b> ) in the presence of different cations in HEPES buffer at pH 7.4.                                                     | S25-S27 |
| 16 | <b>Figure S50-S52.</b> Relative fluorescence intensity diagram of [ <b>H<sub>3</sub>L2-Al<sup>3+</sup></b> ]-[ <b>H<sub>3</sub>L4-Al<sup>3+</sup></b> ] systems in the presence of different cations in 10 mM HEPES buffer at pH 7.4.         | S27-S28 |
| 17 | <b>Figure S53-S56.</b> Relative fluorescence intensity diagram of [ <b>H<sub>3</sub>L1-Al<sup>3+</sup></b> ]-[ <b>H<sub>3</sub>L4-Al<sup>3+</sup></b> ] systems in the presence of different anions in HEPES buffer medium (10 mM) at pH 7.4. | S29-S30 |
| 18 | <b>Figure S57-S59.</b> Visual colour changes of chemo sensors ( <b>H<sub>3</sub>L2-H<sub>3</sub>L4</b> ) (10 $\mu$ M) under presence of common metal ions (1 equivalent) in 10 mM HEPES buffer (pH 7.4).                                      | S30-S32 |
| 19 | <b>Figure S60.</b> Visual colour changes of real samples under normal light (above) and UV lamp (below) in presence of chemosensors ( <b>H<sub>3</sub>L1- H<sub>3</sub>L4</b> ).                                                              | S32     |
| 20 | <b>Figure S61.</b> Visual colour changes in reversibility experiments.                                                                                                                                                                        | S33     |
| 21 | <b>Figure S62-S64.</b> Fluorescence intensity of <b>H<sub>3</sub>L2- H<sub>3</sub>L4</b> (10 $\mu$ M) in the absence and presence of Al <sup>3+</sup> ions (10 $\mu$ M) at various pH values in 10 mM HEPES buffer.                           | S33-S34 |
| 22 | <b>Figure S65-S68.</b> Time-resolved fluorescence decay curves.                                                                                                                                                                               | S35-S36 |
| 23 | <b>Figure S69.</b> Survivability of WI38 cells exposed to <b>H<sub>3</sub>L1-H<sub>3</sub>L4</b> .                                                                                                                                            | S37     |
| 24 | <b>Figure S70.</b> Selected contour plots of molecular orbitals of <b>H<sub>3</sub>L1-H<sub>3</sub>L4</b> .                                                                                                                                   | S38     |
| 25 | <b>Figure S71-S73.</b> Pictorial representation of vertical transition of chemosensors ( <b>H<sub>3</sub>L1-H<sub>3</sub>L4</b> ).                                                                                                            | S39-S40 |
| 26 | <b>Table S1.</b> Crystal parameters and selected refinement details for the chemosensors ( <b>H<sub>3</sub>L1-H<sub>3</sub>L4</b> ).                                                                                                          | S41     |
| 27 | <b>Table S2-S3.</b> Selected Bond lengths ( $\text{\AA}$ ) and Bond angles ( $^\circ$ ) for <b>H<sub>3</sub>L1-H<sub>3</sub>L4</b> .                                                                                                          | S42-S43 |
| 28 | <b>Table S4.</b> Binding constant values of chemosensors in presence of Al <sup>3+</sup> ions in different solvent system.                                                                                                                    | S43     |
| 29 | <b>Table S5.</b> Lifetime, quantum yield, LOD and binding constant values of chemosensors ( <b>H<sub>3</sub>L1-H<sub>3</sub>L4</b> ) and complexes ( <b>1-4</b> ).                                                                            | S44     |
| 30 | <b>Table S6.</b> Energy (eV) of selected M.O.s of chemosensors ( <b>H<sub>3</sub>L1-H<sub>3</sub>L4</b> ).                                                                                                                                    | S44     |
| 31 | <b>Table S7.</b> Electronic transition calculated by TDDFT using B3LYP/CPCM method in methanol solvent of chemosensors ( <b>H<sub>3</sub>L1-H<sub>3</sub>L4</b> ).                                                                            | S45     |
| 32 | <b>Chart S1.</b> Literature survey of rhodamine based derivatives used in sensing of Al <sup>3+</sup> ion.                                                                                                                                    | S46-S47 |

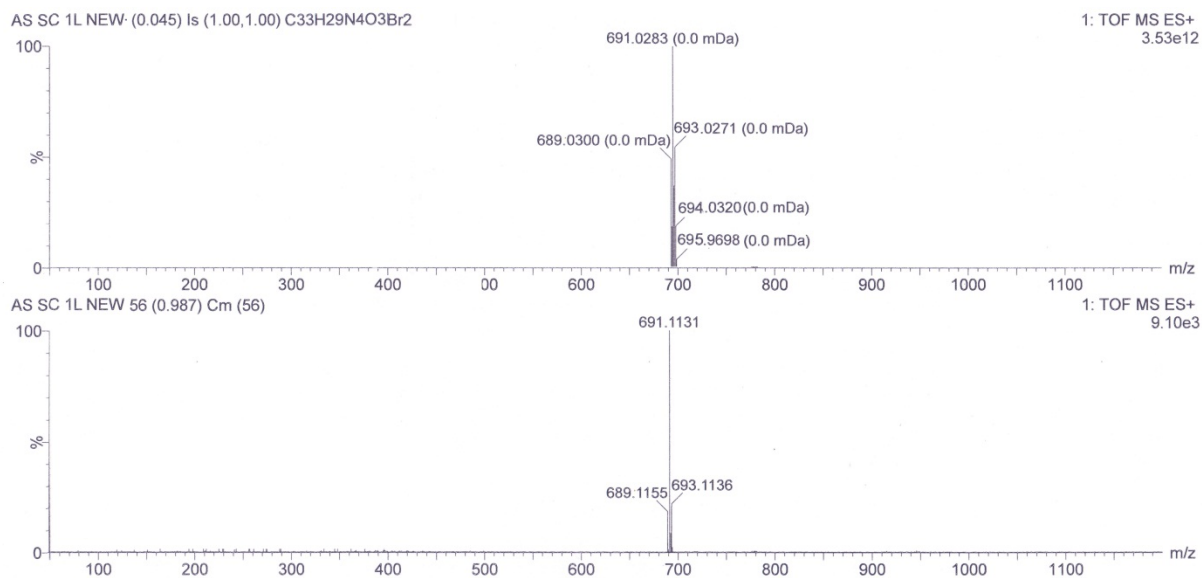

**Figure S1.** ESI-mass spectrum of chemosensor **H<sub>3</sub>L1** (above is simulated pattern and below is experimental finding).

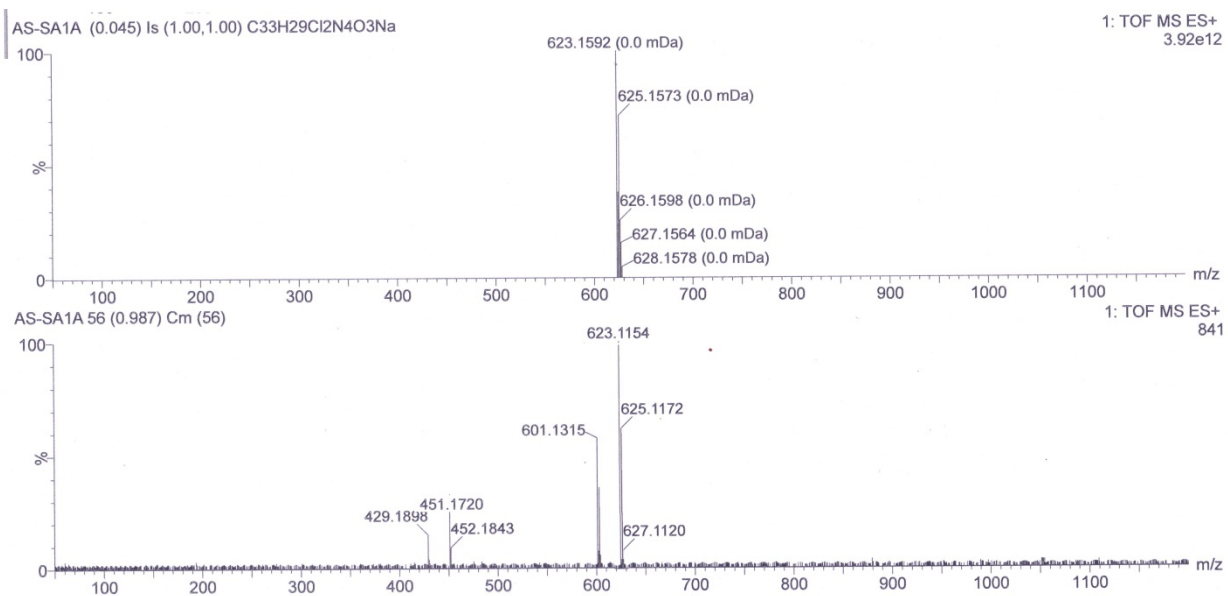

**Figure S2.** ESI-mass spectrum of chemosensor **H<sub>3</sub>L2** (above is simulated pattern and below is experimental finding).

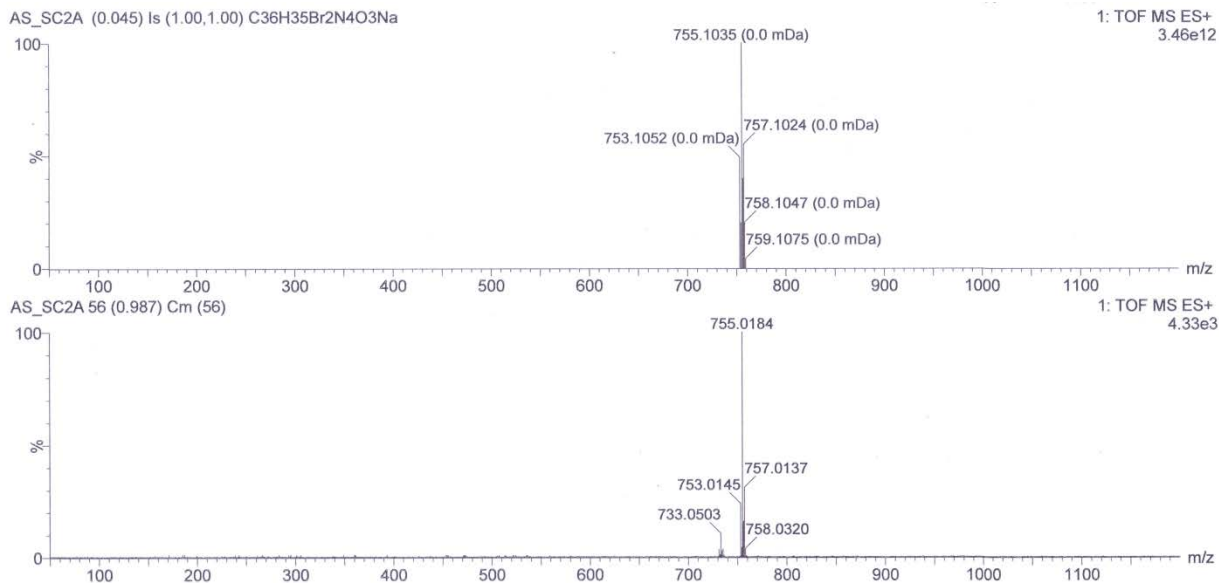

**Figure S3.** ESI-mass spectrum of chemosensor **H<sub>3</sub>L<sub>3</sub>** (above is simulated pattern and below is experimental finding).

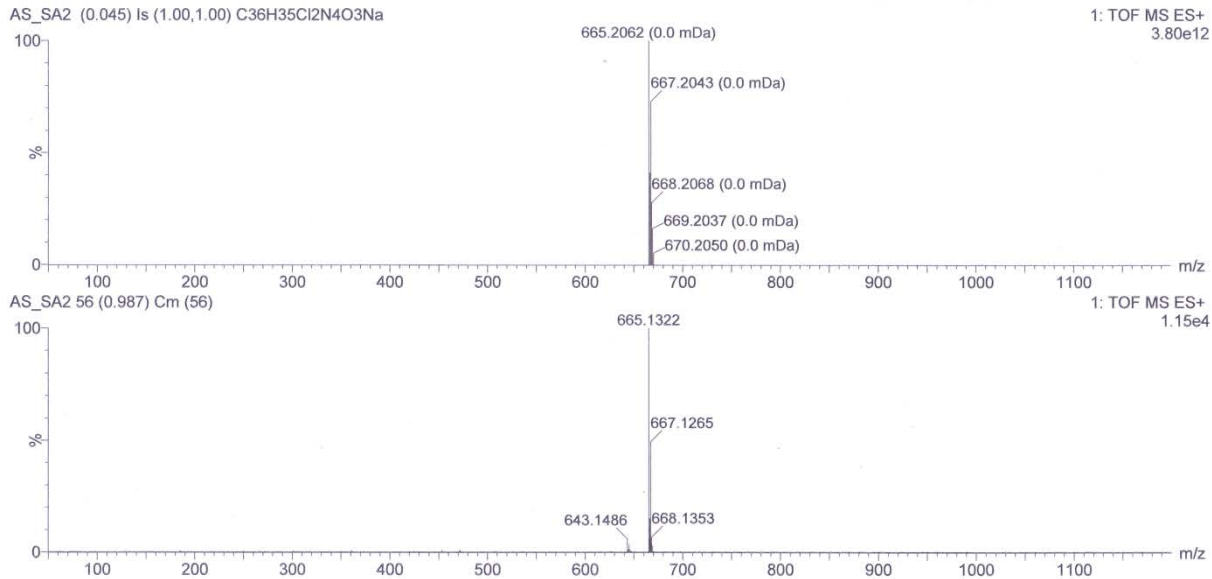

**Figure S4.** ESI-mass spectrum of chemosensor **H<sub>3</sub>L<sub>4</sub>** (above is simulated pattern and below is experimental finding).

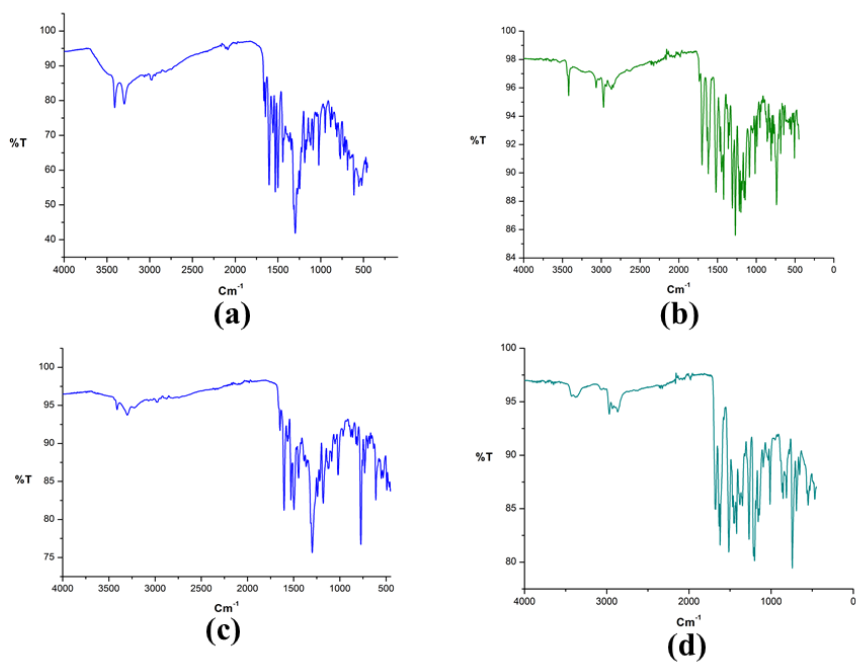

**Figure S5.** FTIR spectra of chemosensors (a) H<sub>3</sub>L1, (b) H<sub>3</sub>L2, (c) H<sub>3</sub>L3 and (d) H<sub>3</sub>L4.

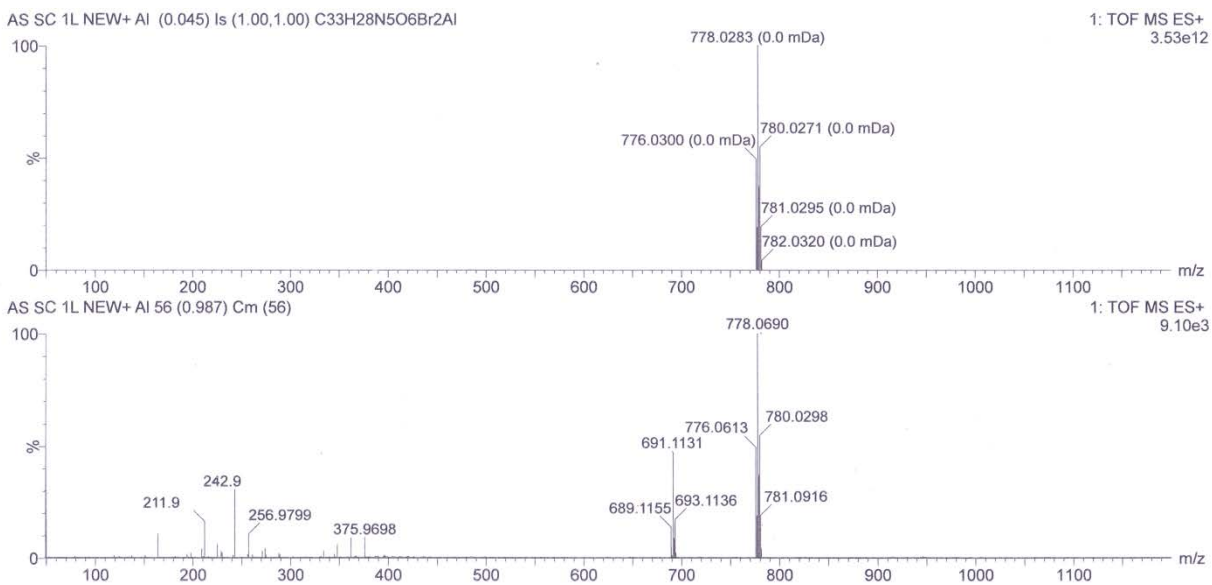

**Figure S6.** ESI-mass spectrum of complex **1** (above is simulated pattern and below is experimental finding).

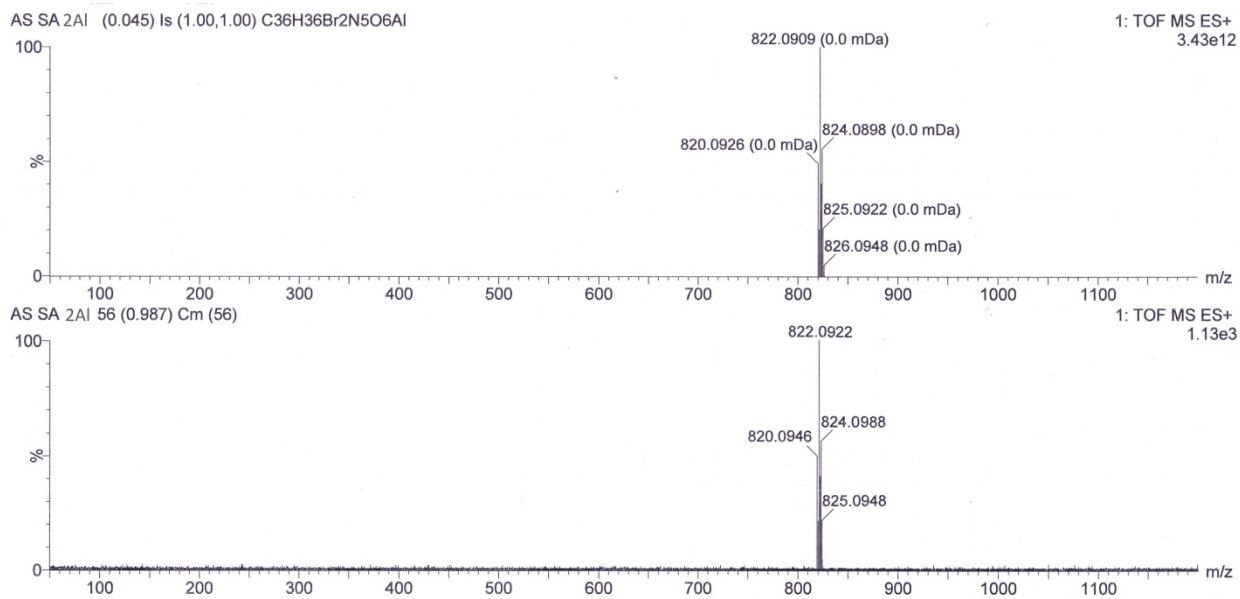

**Figure S7.** ESI-mass spectrum of complex **2** (above is simulated pattern and below is experimental finding).

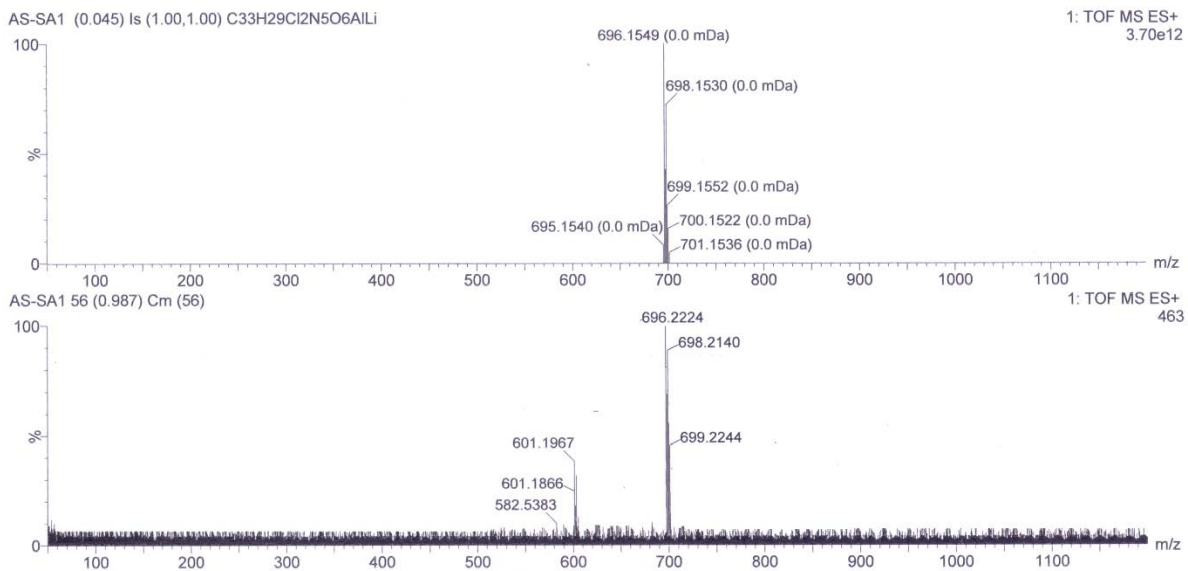

**Figure S8.** ESI-mass spectrum of complex **3** (above is simulated pattern and below is experimental finding).

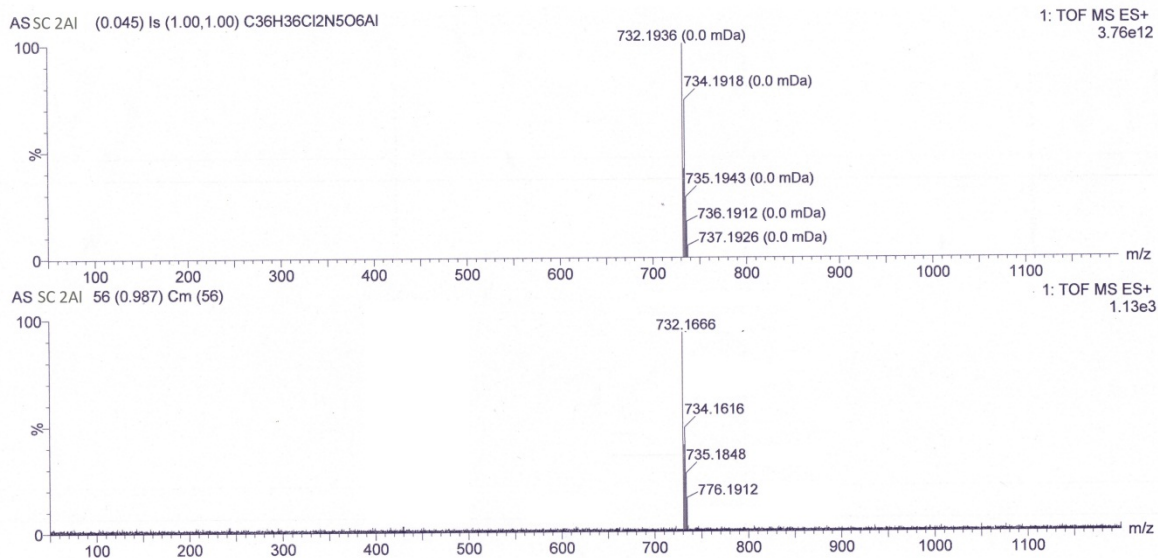

**Figure S9.** ESI-mass spectrum of complex **4** (above is simulated pattern and below is experimental finding).

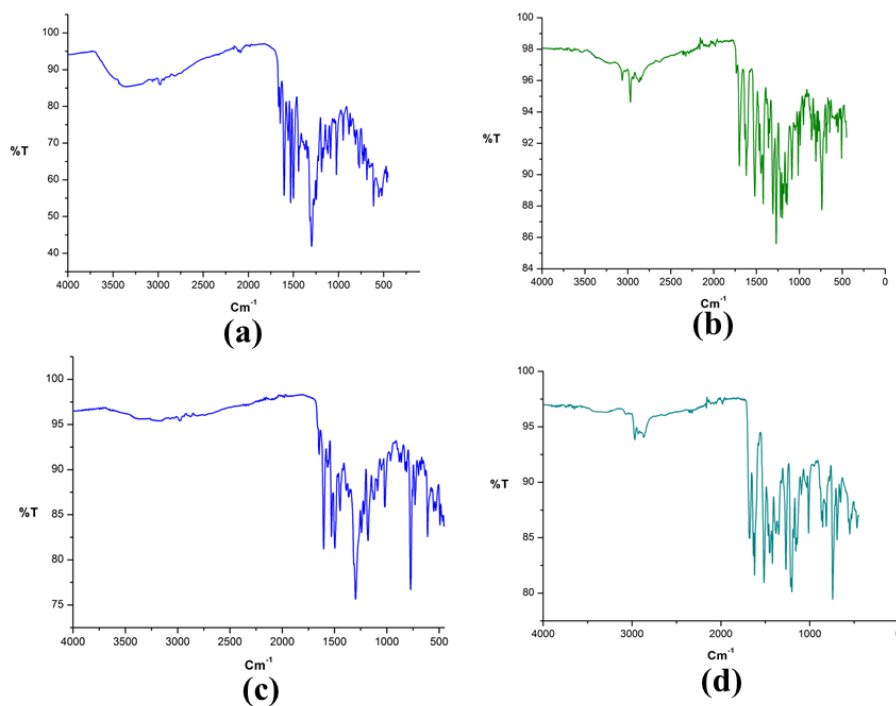

**Figure S10.** FTIR spectra of (a) complex 1, (b) complex 2, (c) complex 3 and (d) complex 4.

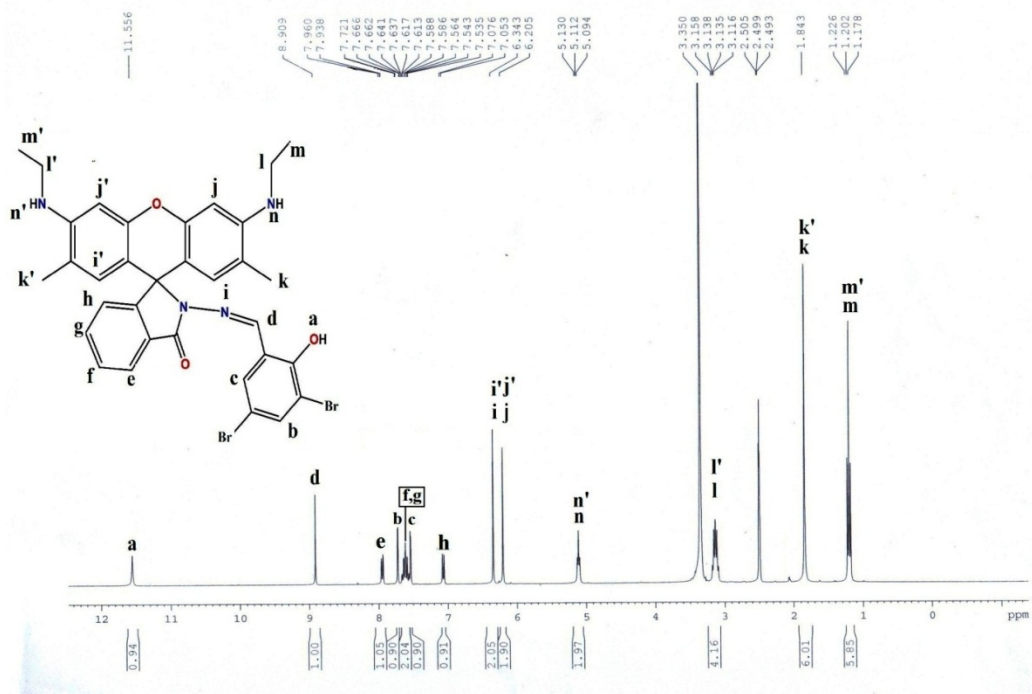

**Figure S11.** <sup>1</sup>H-NMR of the chemosensor **H<sub>3</sub>L1** in DMSO-*d*<sub>6</sub> recorded on a 400 MHz Bruker NMR spectrometer.

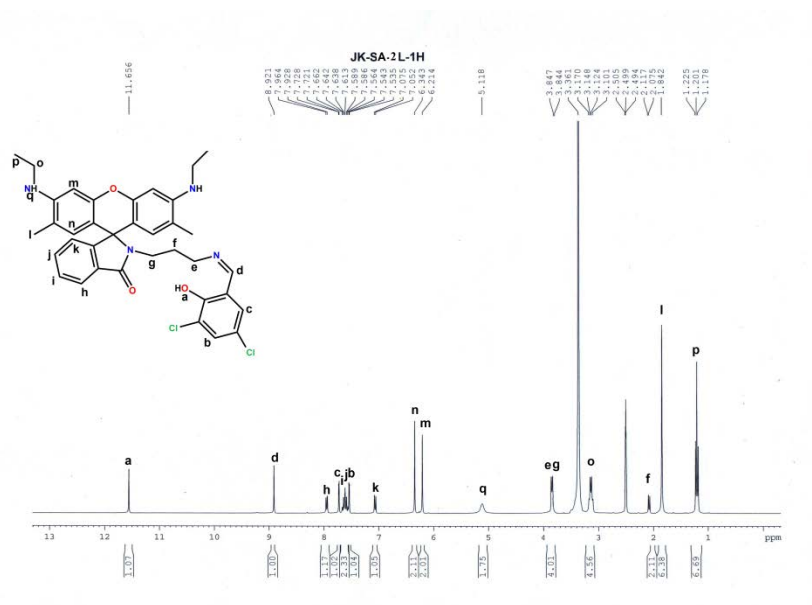

**Figure S12.** <sup>1</sup>H-NMR of the free ligand **H<sub>3</sub>L2** in DMSO-*d*<sub>6</sub> recorded on a 400 MHz Bruker NMR spectrometer.



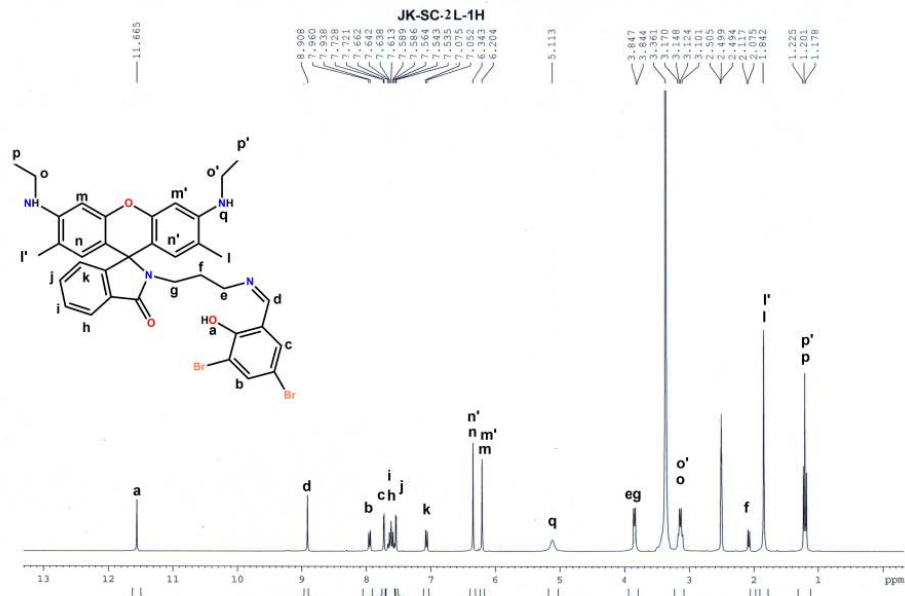

**Figure S13.** <sup>1</sup>H-NMR of the free ligand **H<sub>3</sub>L3** in DMSO-*d*<sub>6</sub> recorded on a 400 MHz Bruker NMR spectrometer.

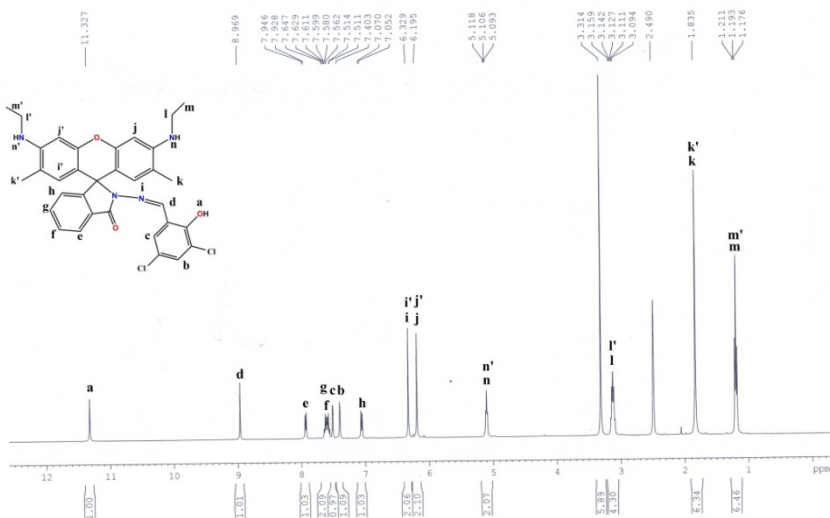

**Figure S14.** <sup>1</sup>H-NMR of the free ligand **H<sub>3</sub>L4** in DMSO-*d*<sub>6</sub> recorded on a 400 MHz Bruker NMR spectrometer.

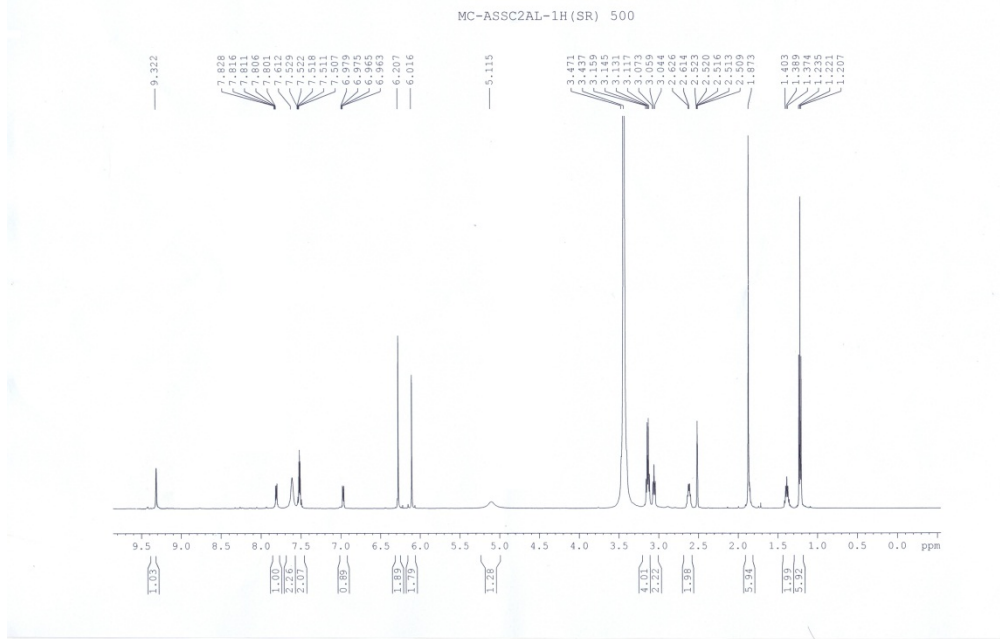

**Figure S15.**  $^1\text{H-NMR}$  of the complex **1** in  $\text{DMSO-}d_6$  recorded on a 400 MHz Bruker NMR spectrometer

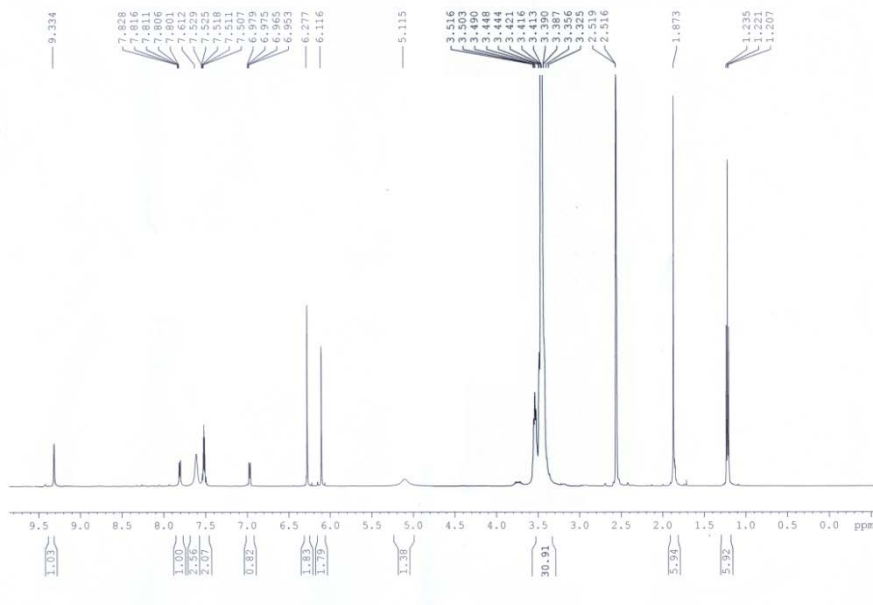

**Figure S16.**  $^1\text{H-NMR}$  of the complex **2** in  $\text{DMSO-}d_6$  recorded on a 400 MHz Bruker NMR spectrometer.

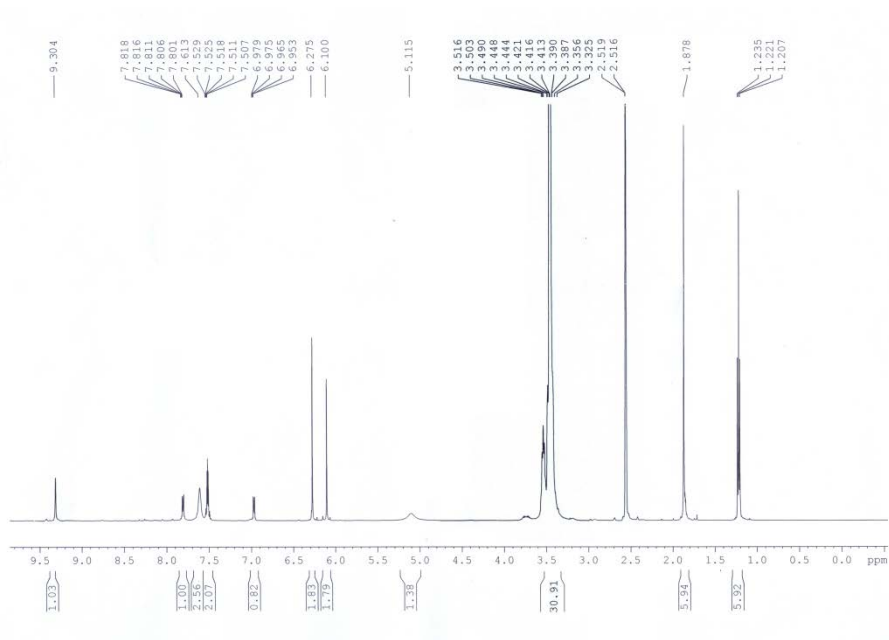

**Figure S17.**  $^1\text{H-NMR}$  of the complex **3** in  $\text{DMSO-}d_6$  recorded on a 400 MHz Bruker NMR spectrometer.

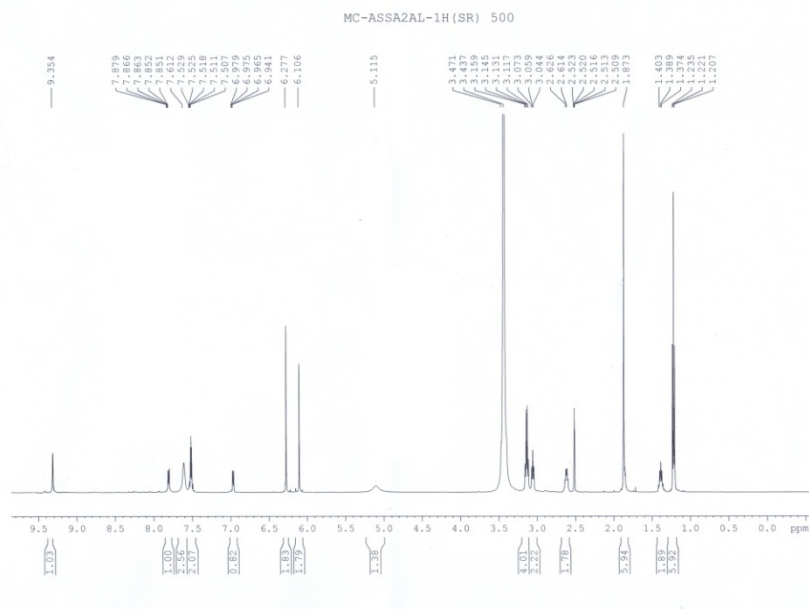

**Figure S18.**  $^1\text{H-NMR}$  of the complex **4** in  $\text{DMSO-}d_6$  recorded on a 400 MHz Bruker NMR spectrometer.

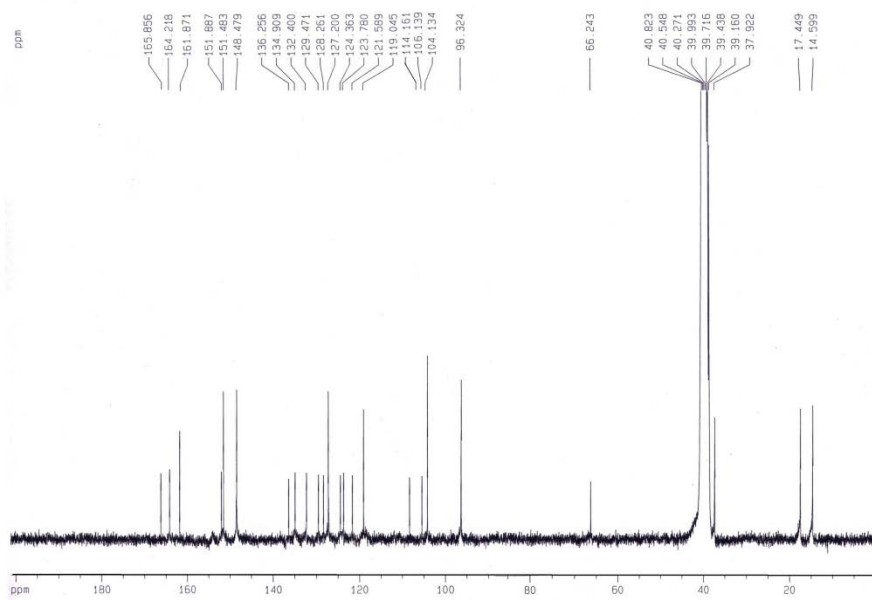

**Figure S19.**  $^{13}\text{C}$  NMR spectrum of **H<sub>3</sub>L1** in  $\text{DMSO-}d_6$ .

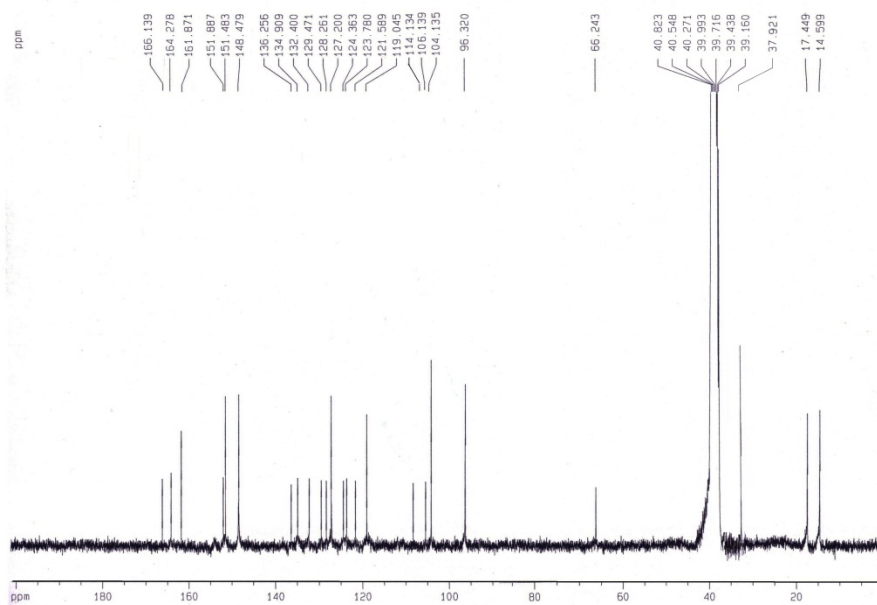

**Figure S20.**  $^{13}\text{C}$  NMR spectrum of **H<sub>3</sub>L2** in  $\text{DMSO-}d_6$ .

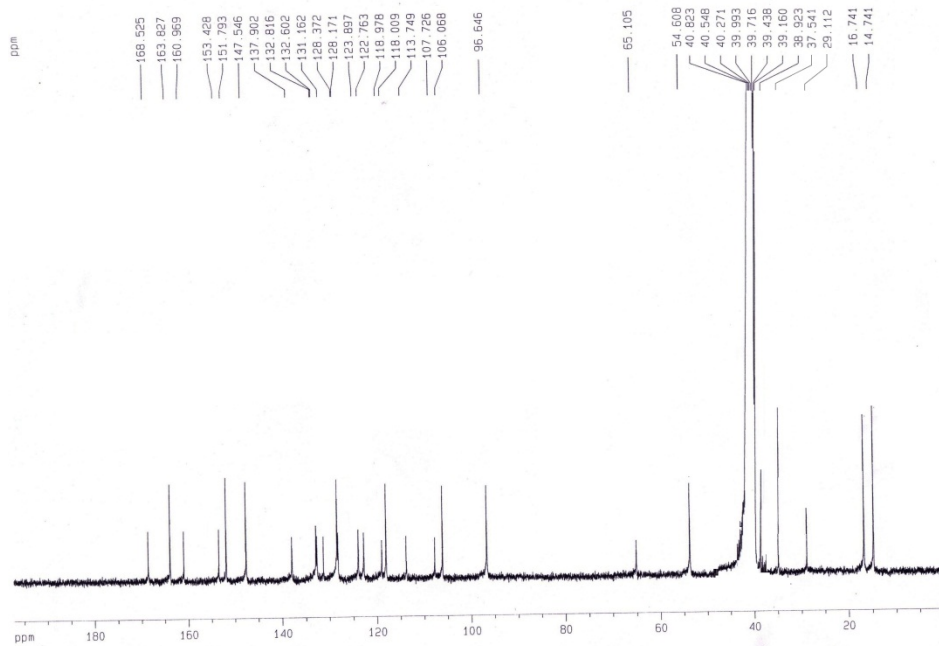

Figure S21.  $^{13}\text{C}$  NMR spectrum of  $\text{H}_3\text{L3}$  in  $\text{DMSO-}d_6$ .

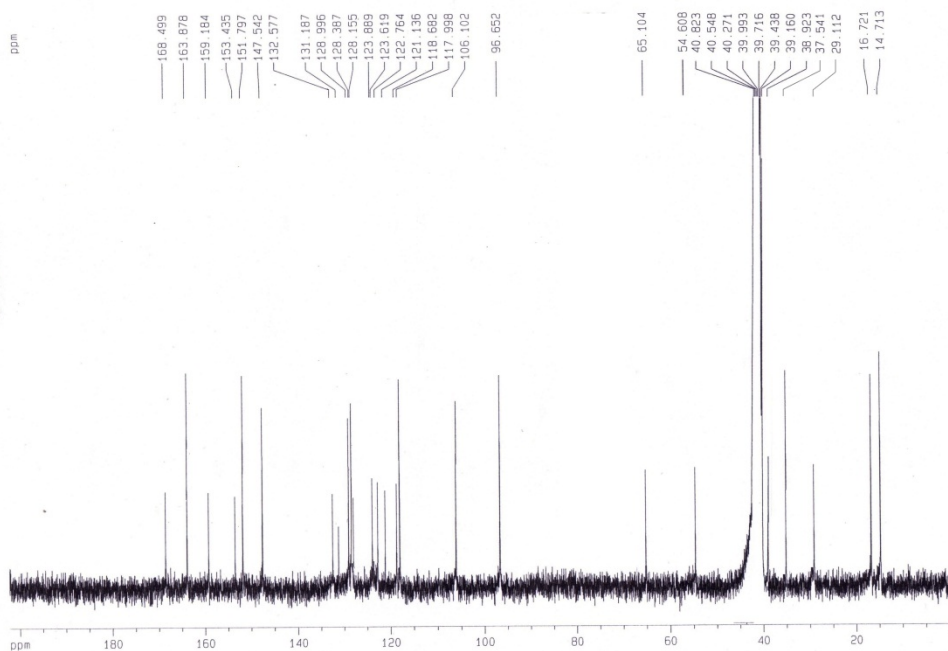

Figure S22.  $^{13}\text{C}$  NMR spectrum of  $\text{H}_3\text{L4}$  in  $\text{DMSO-}d_6$ .

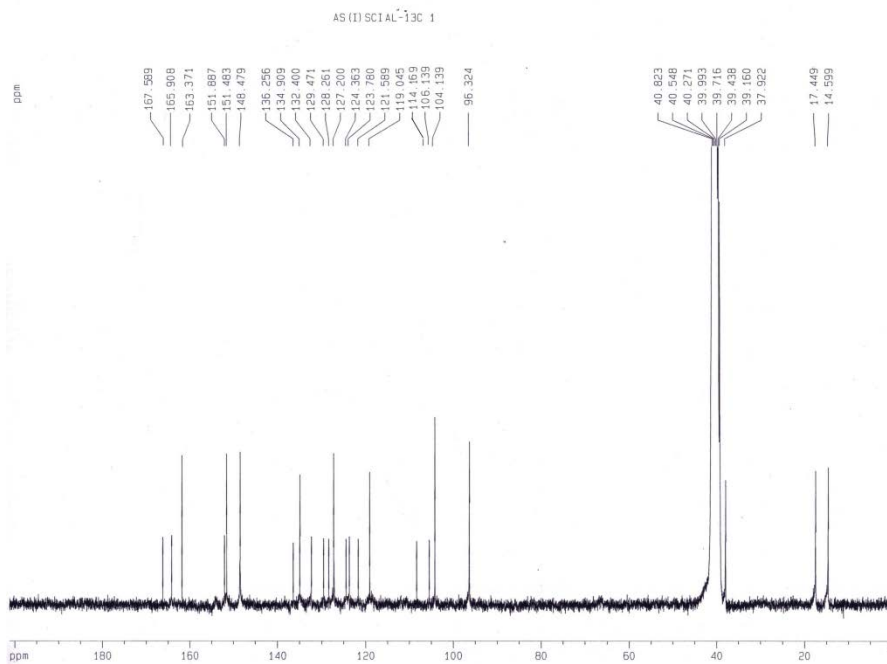

**Figure S23.**  $^{13}\text{C}$  NMR spectrum of complex **1** in  $\text{DMSO-}d_6$

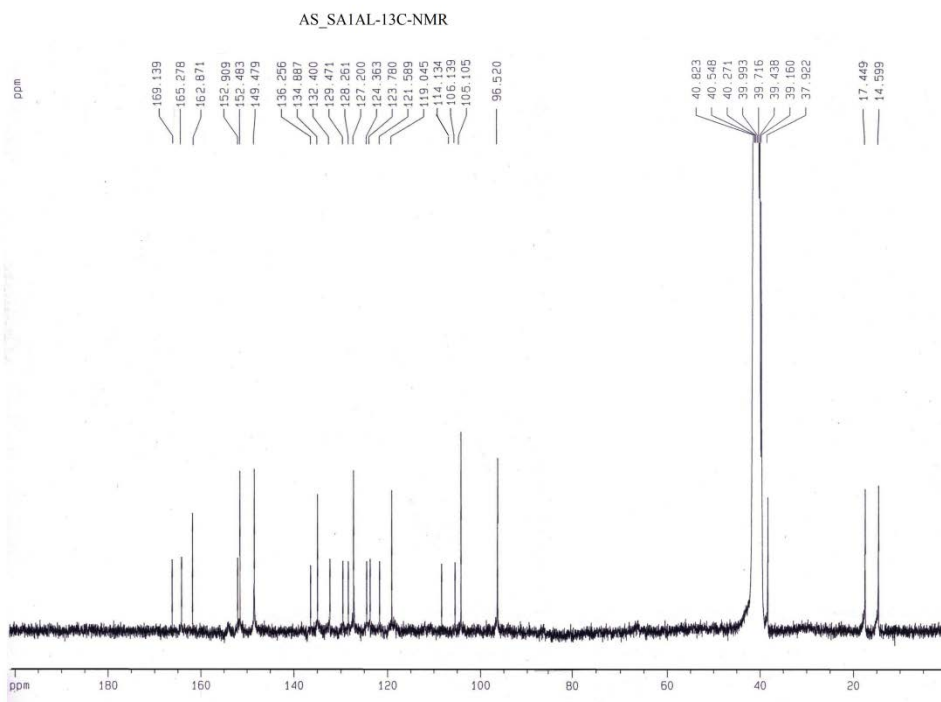

**Figure S24.**  $^{13}\text{C}$  NMR spectrum of complex **2** in  $\text{DMSO-}d_6$ .

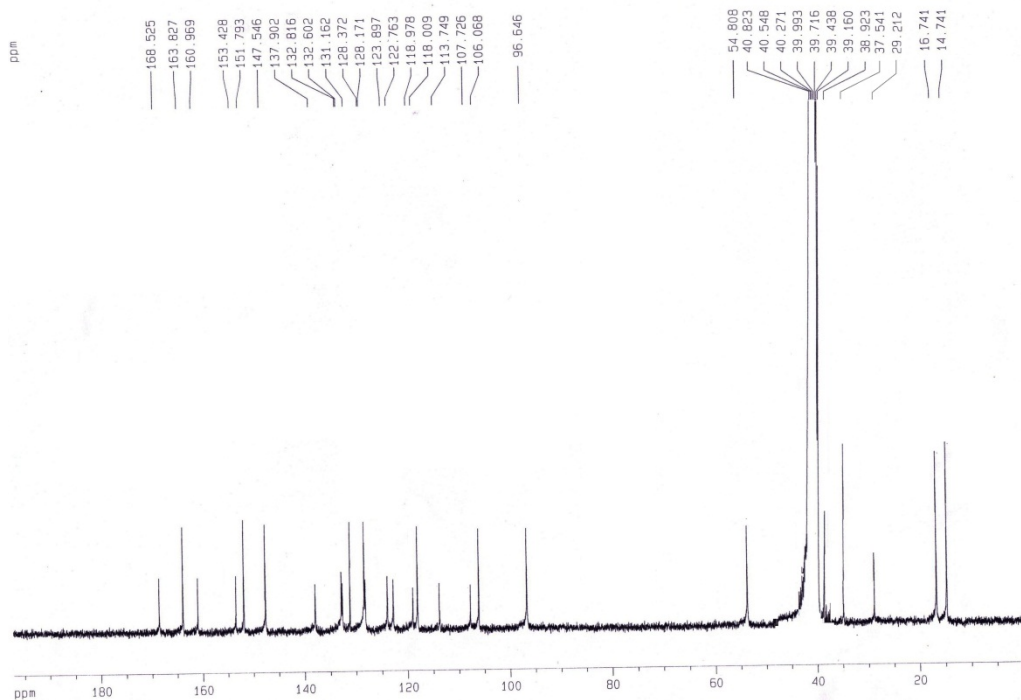

**Figure S25.**  $^{13}\text{C}$  NMR spectrum of complex **3** in  $\text{DMSO-}d_6$ .

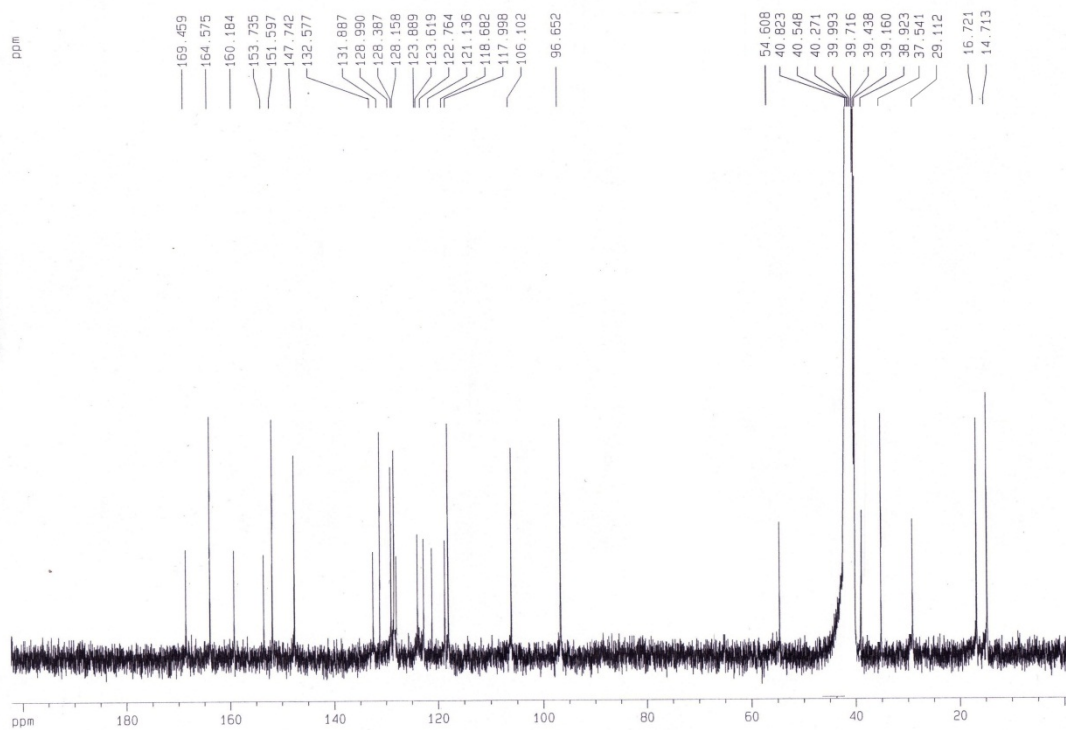

**Figure S26.**  $^{13}\text{C}$  NMR spectrum of complex **4** in  $\text{DMSO-}d_6$ .

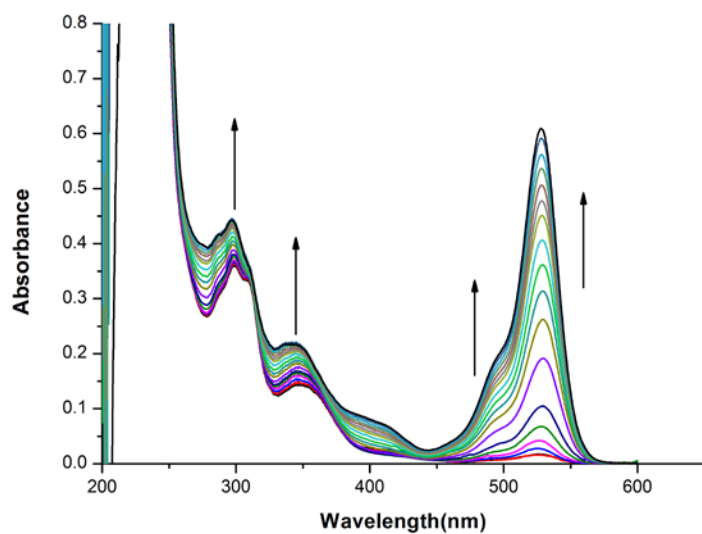

**Figure S27.** Absorption titration study of **H<sub>3</sub>L2** (10 μM) with gradual addition of Al<sup>3+</sup> ions, 0-11 μM in 10 mM HEPES buffer at pH 7.4.

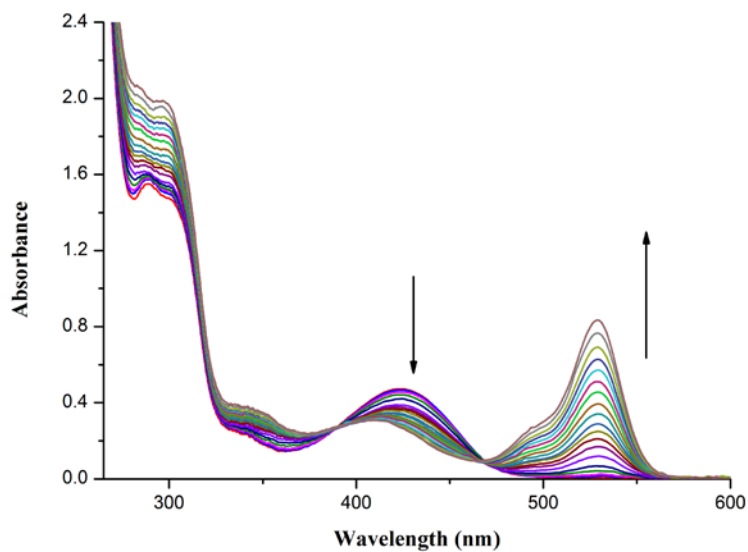

**Figure S28.** Absorption titration study of **H<sub>3</sub>L3** (10 μM) with gradual addition of Al<sup>3+</sup> ions, 0-11 μM in 10 mM HEPES buffer at pH 7.



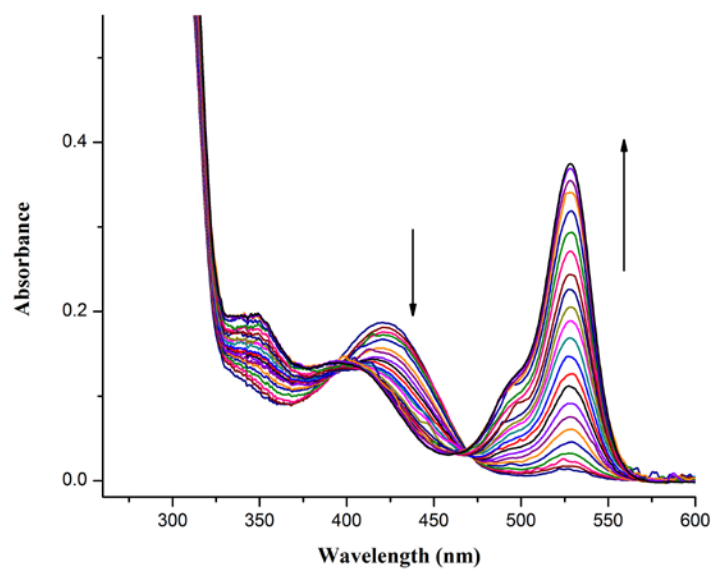

**Figure S29.** Absorption titration study of **H<sub>3</sub>L4** (10  $\mu$ M) with gradual addition of  $\text{Al}^{3+}$  ions, 0-11  $\mu$ M in 10 mM HEPES buffer at pH 7.4.

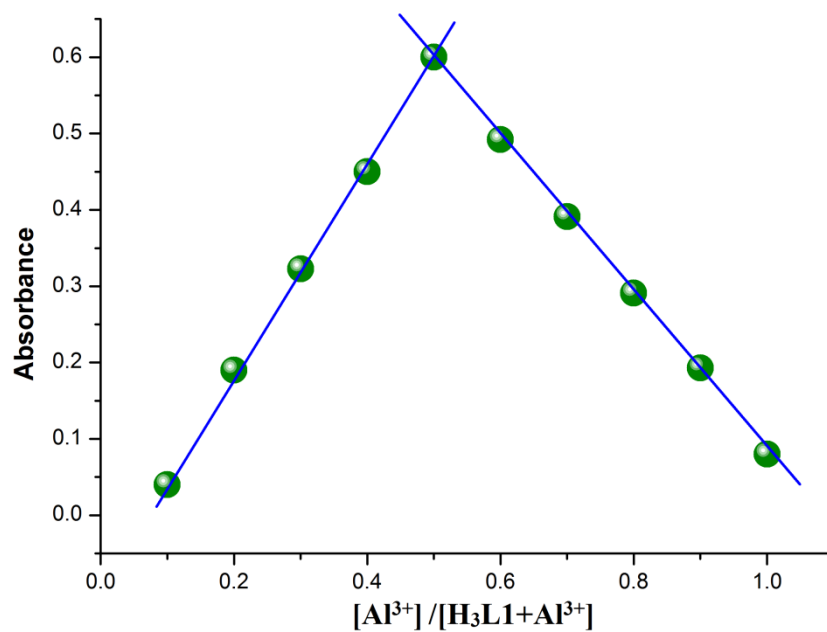

**Figure S30.** 1:1 binding stoichiometry has shown by Job's plot of complex1. Symbols and solid lines represent the experimental and simulated profiles, respectively.

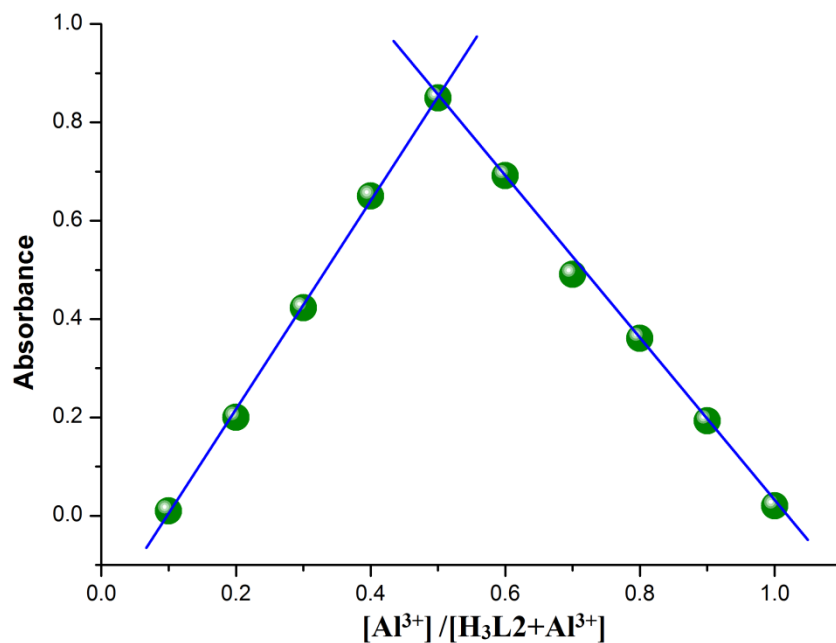

**Figure S31.** 1:1 binding stoichiometry has shown by Job's plot of complex 2. Symbols and solid lines represent the experimental and simulated profiles, respectively.

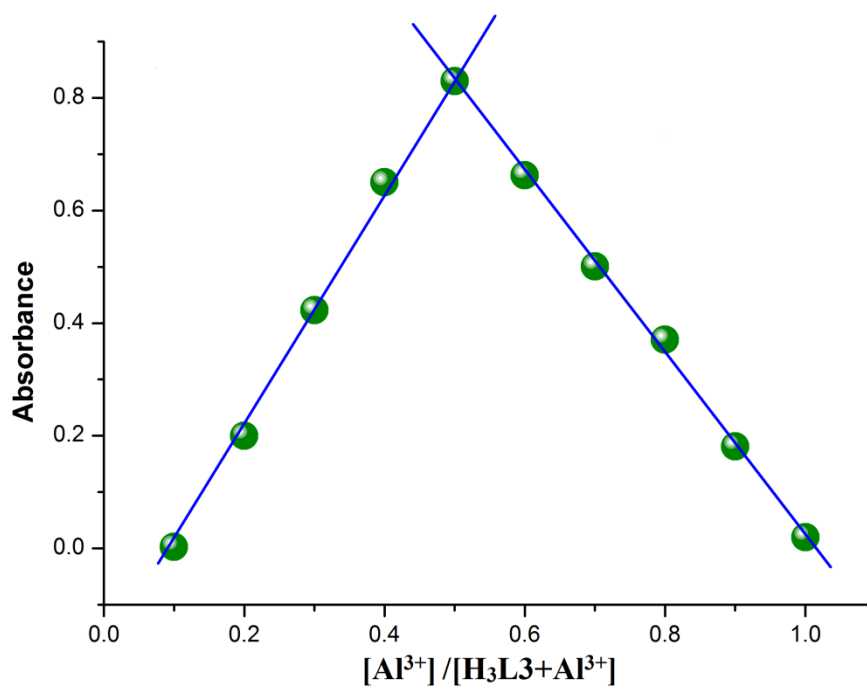

**Figure S32.** 1:1 binding stoichiometry has shown by Job's plot of complex 3. Symbols and solid lines represent the experimental and simulated profiles, respectively.

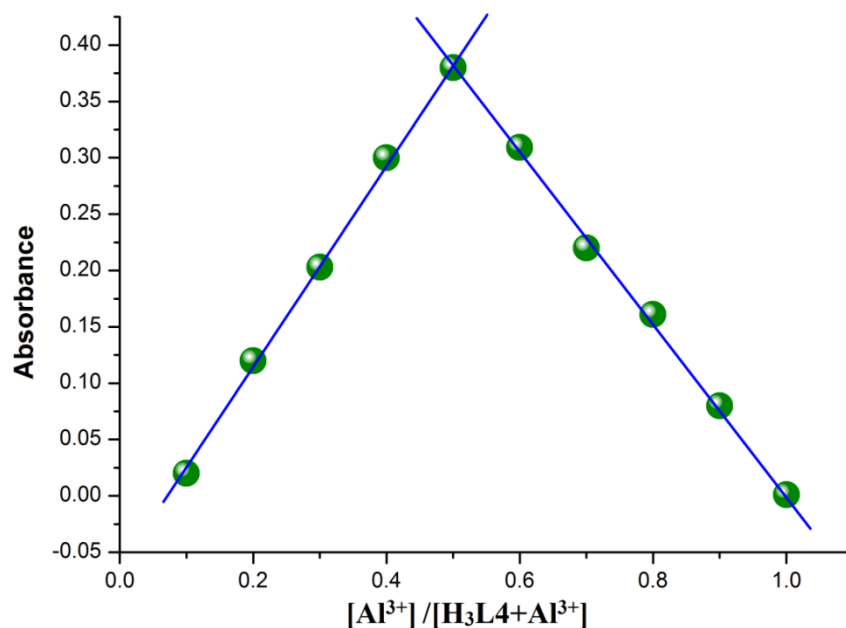

**Figure S33.** 1:1 binding stoichiometry has shown by Job's plot of complex **4**. Symbols and solid lines represent the experimental and simulated profiles, respectively.

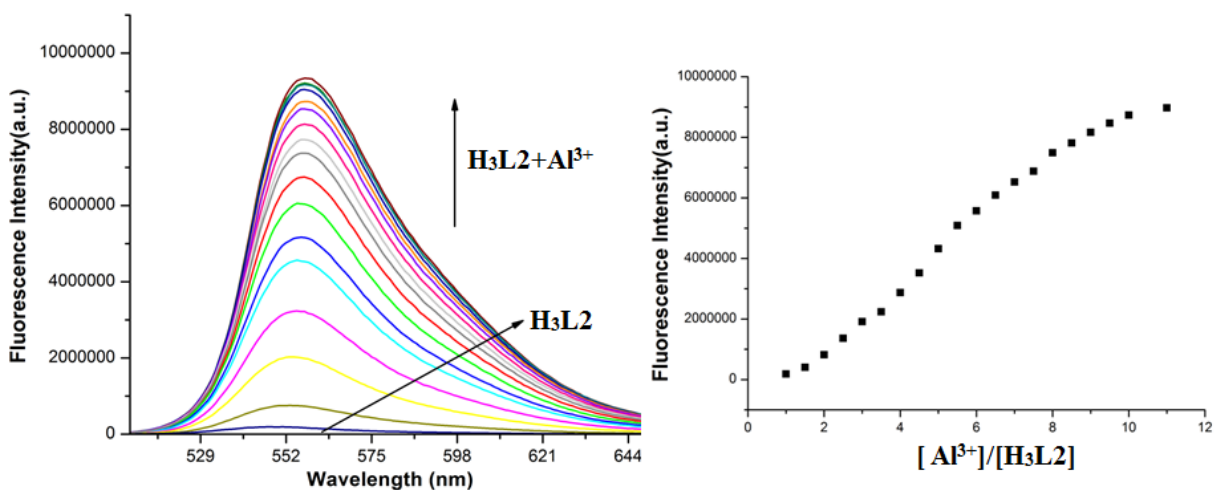

**Figure S34.** Fluorescence titration of **H<sub>3</sub>L2** (10  $\mu$ M) in 10 mM HEPES buffer at pH =7.4 by successive addition of Al<sup>3+</sup> (0–11  $\mu$ M) with  $\lambda_{em}$ = 555 nm (1/1 slit).

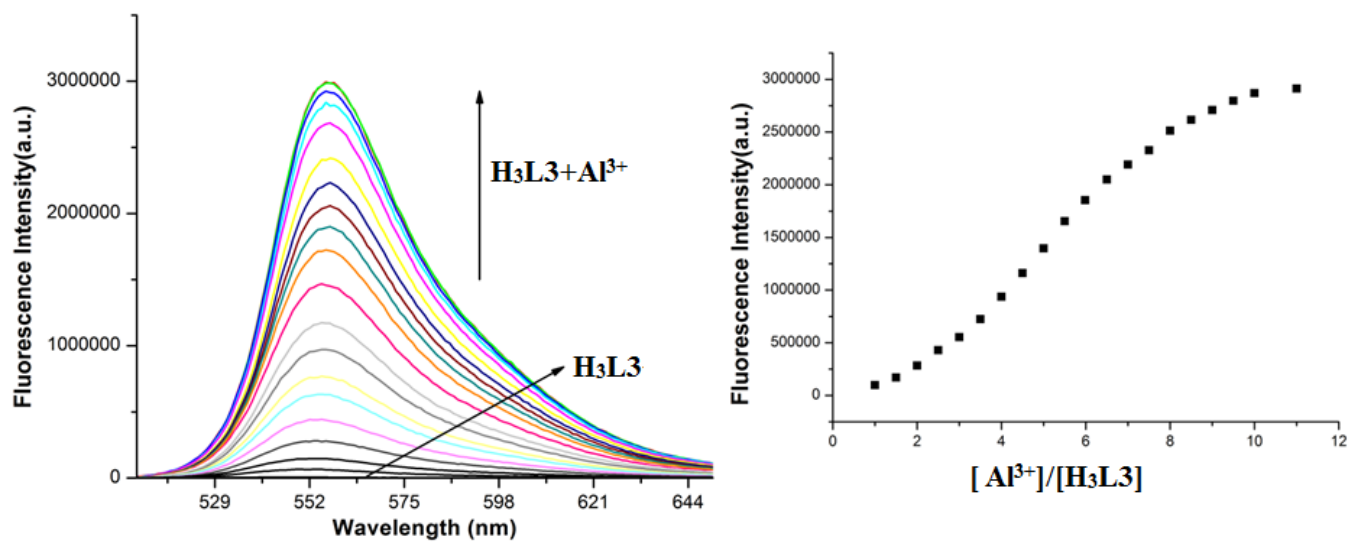

**Figure S35.** Fluorescence titration of **H<sub>3</sub>L3** (10  $\mu$ M) in 10 mM HEPES buffer at pH =7.4 by successive addition of  $\text{Al}^{3+}$  (0–11  $\mu$ M) with  $\lambda_{em}$ = 555 nm (1/1 slit).

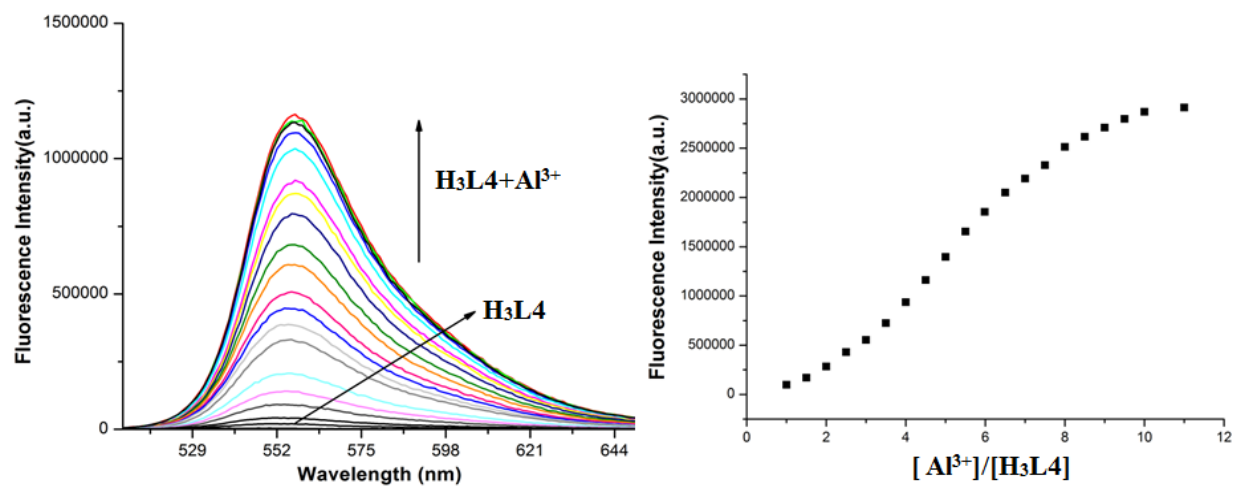

**Figure S36.** Fluorescence titration of **H<sub>3</sub>L4** (10  $\mu$ M) in 10 mM HEPES buffer at pH =7.4 by successive addition of  $\text{Al}^{3+}$  (0–11  $\mu$ M) with  $\lambda_{em}$ = 555 nm (1/1 slit).

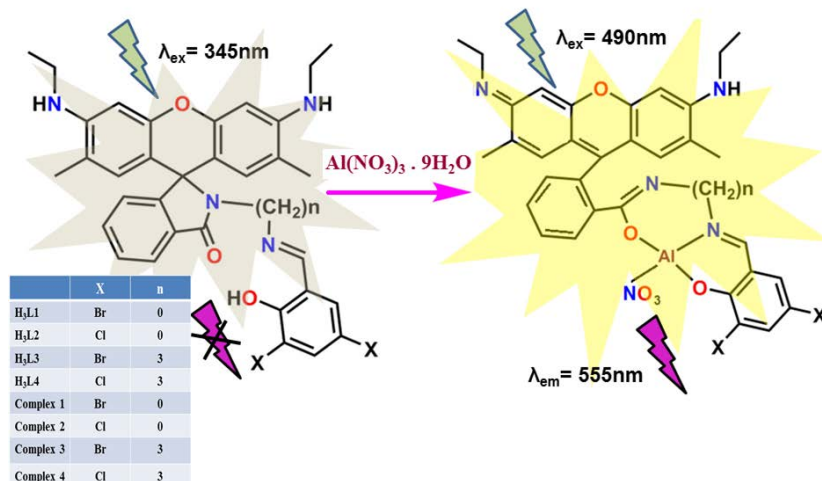

**Figure S37.** Pictorial representation of spirolactam ring opening in presence of Al<sup>3+</sup> ions.

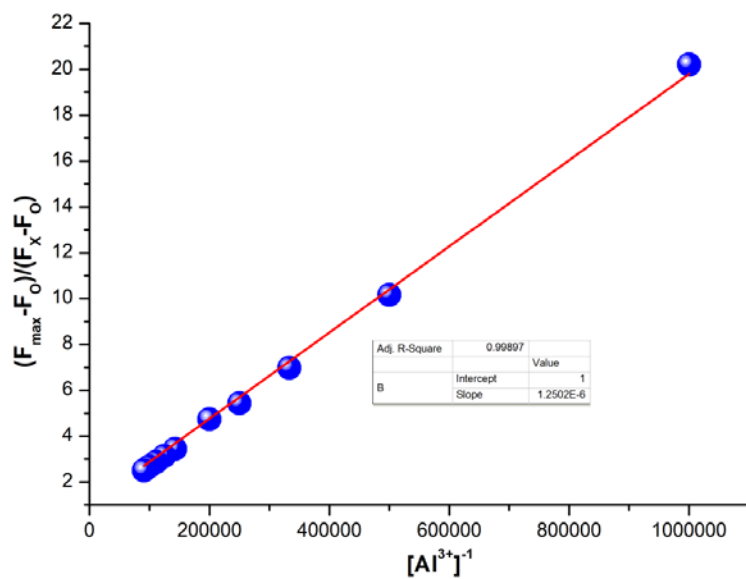

**Figure S38.** Benesi-Hildebrand plot for complex **1**. The plot is obtained after adding 10  $\mu\text{M}$  Al<sup>3+</sup> solution to the **H<sub>3</sub>L1** solution (10  $\mu\text{M}$ ) (in 10 mM HEPES buffer medium, pH 7.4).

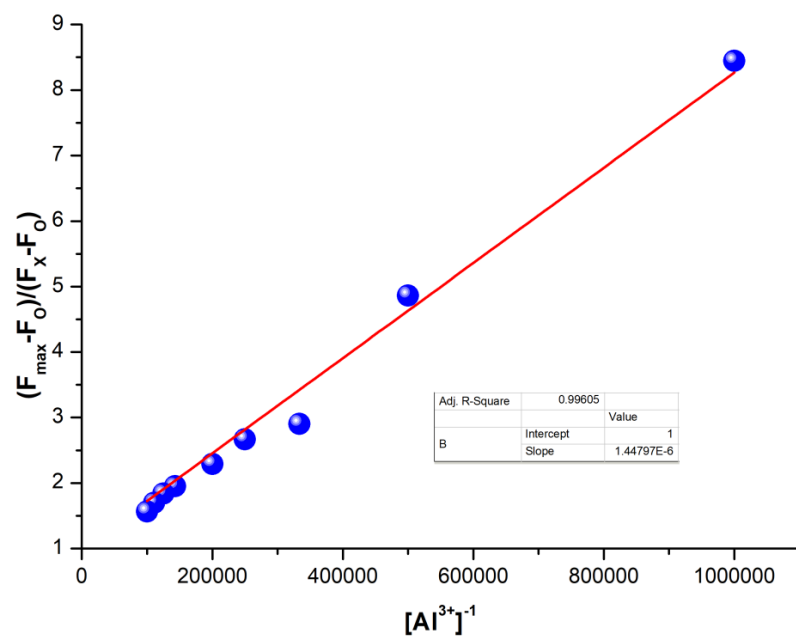

**Figure S39.** Benesi-Hildebrand plot for complex **2**. The plot is obtained after adding 10  $\mu\text{M}$   $\text{Al}^{3+}$  solution to the **H<sub>3</sub>L2** solution (10  $\mu\text{M}$ ) (in 10 mM HEPES buffer medium, pH 7.4).

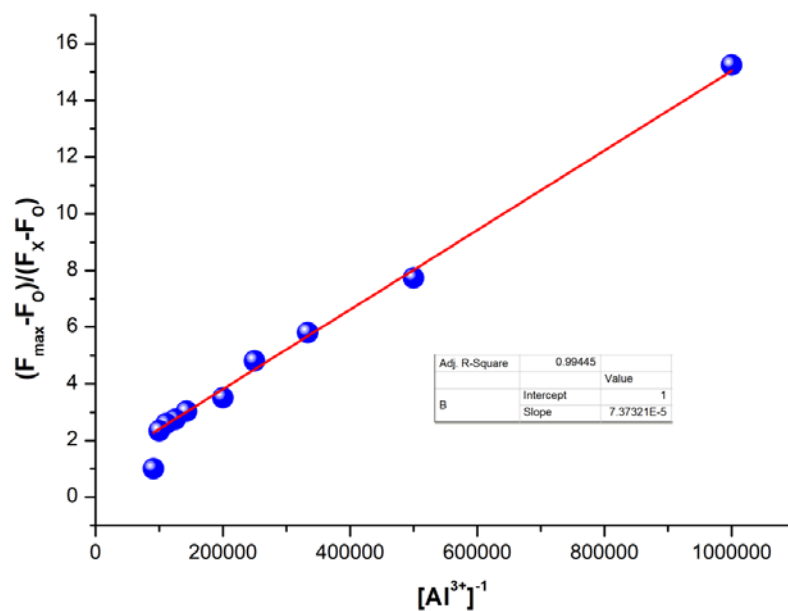

**Figure S40.** Benesi-Hildebrand plot for complex **3**. The plot is obtained after adding 10  $\mu\text{M}$   $\text{Al}^{3+}$  solution to the **H<sub>3</sub>L3** solution (10  $\mu\text{M}$ ) (in 10 mM HEPES buffer medium, pH 7.4).

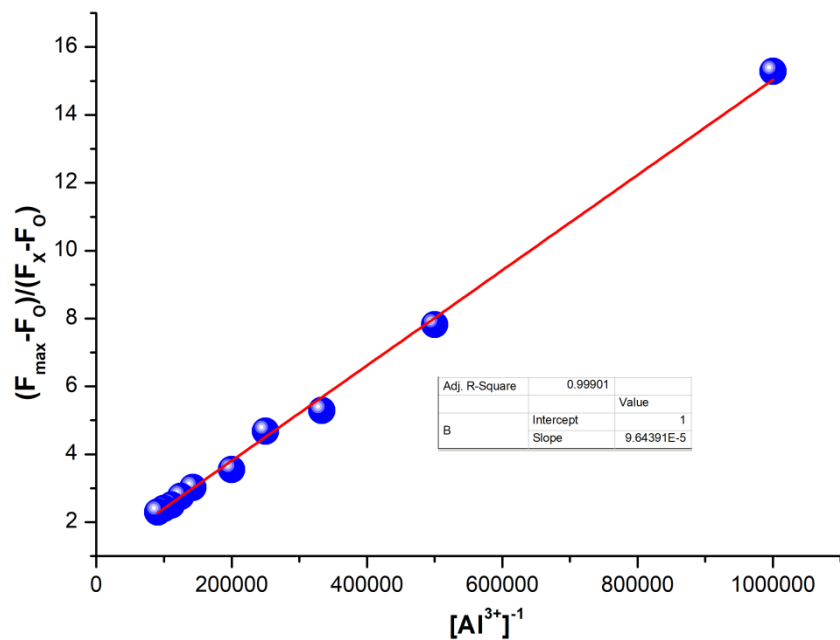

**Figure S41.** Benesi-Hildebrand plot for complex **4**. The plot is obtained after adding 10  $\mu\text{M}$   $\text{Al}^{3+}$  solution to the **H<sub>3</sub>L4** solution (10  $\mu\text{M}$ ) (in 10 mM HEPES buffer medium, pH 7.4).

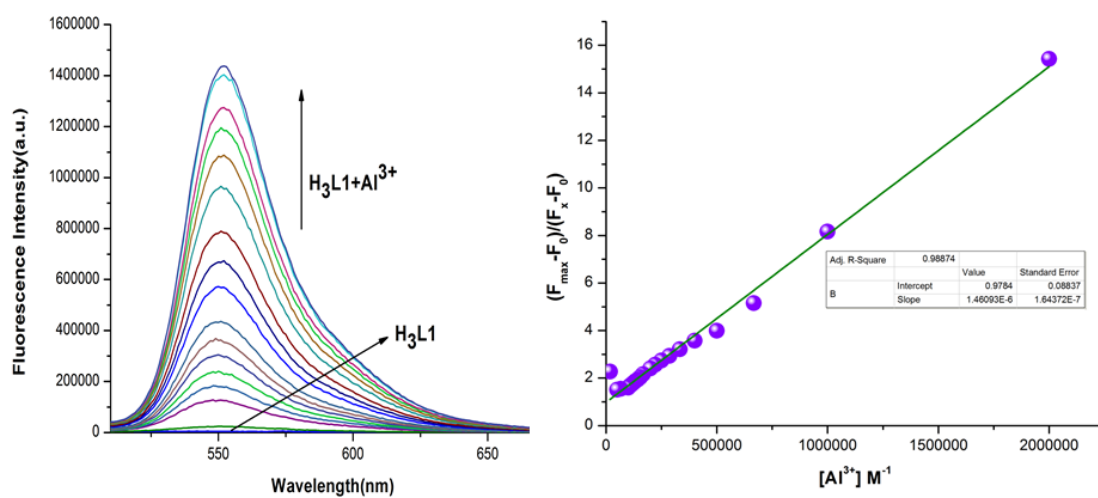

**Figure S42.** Fluorescence titration of **H<sub>3</sub>L1** (10  $\mu\text{M}$ ) in THF solvent by gradual addition of  $\text{Al}^{3+}$  (0–11  $\mu\text{M}$ ) with  $\lambda_{\text{ex}} = 490$  nm and corresponding Benesi-Hildebrand plot.

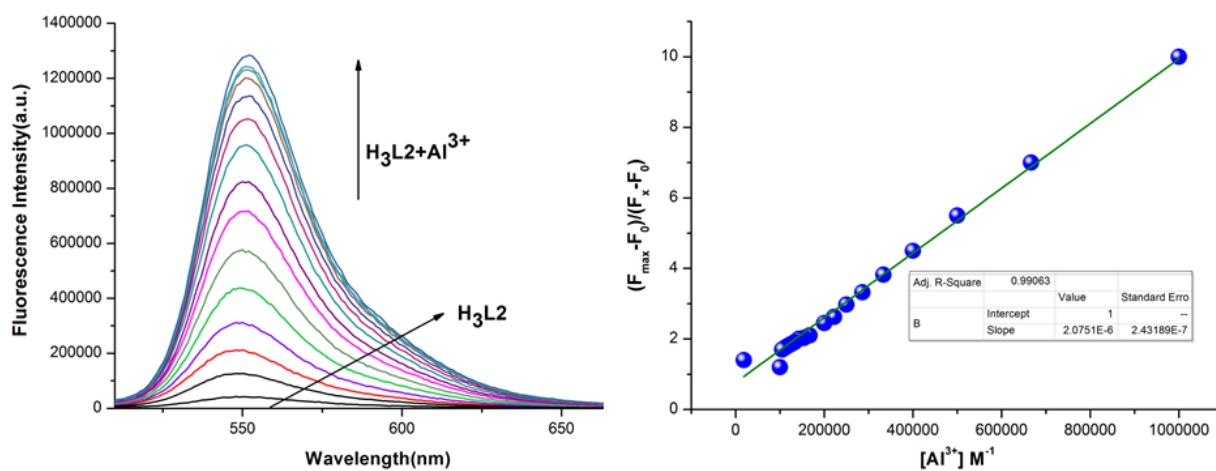

**Figure S43.** Fluorescence titration of **H<sub>3</sub>L2** (10  $\mu$ M) in THF solvent by gradual addition of  $\text{Al}^{3+}$  (0–11  $\mu$ M) with  $\lambda_{\text{ex}}=490$  nm and corresponding Benesi-Hildebrand plot.

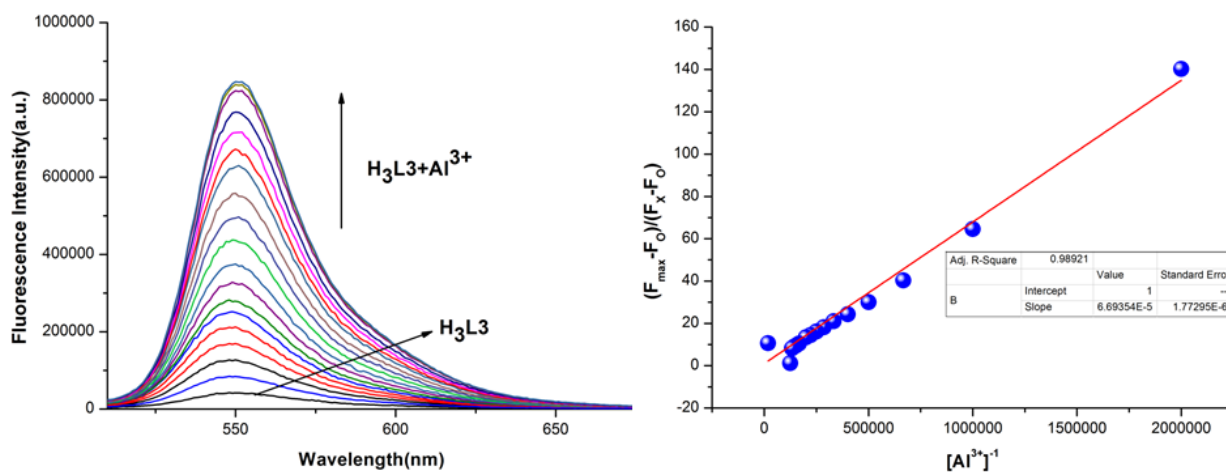

**Figure S44.** Fluorescence titration of **H<sub>3</sub>L3** (10  $\mu$ M) in THF solvent by gradual addition of  $\text{Al}^{3+}$  (0–11  $\mu$ M) with  $\lambda_{\text{ex}}=490$  nm and corresponding Benesi-Hildebrand plot.



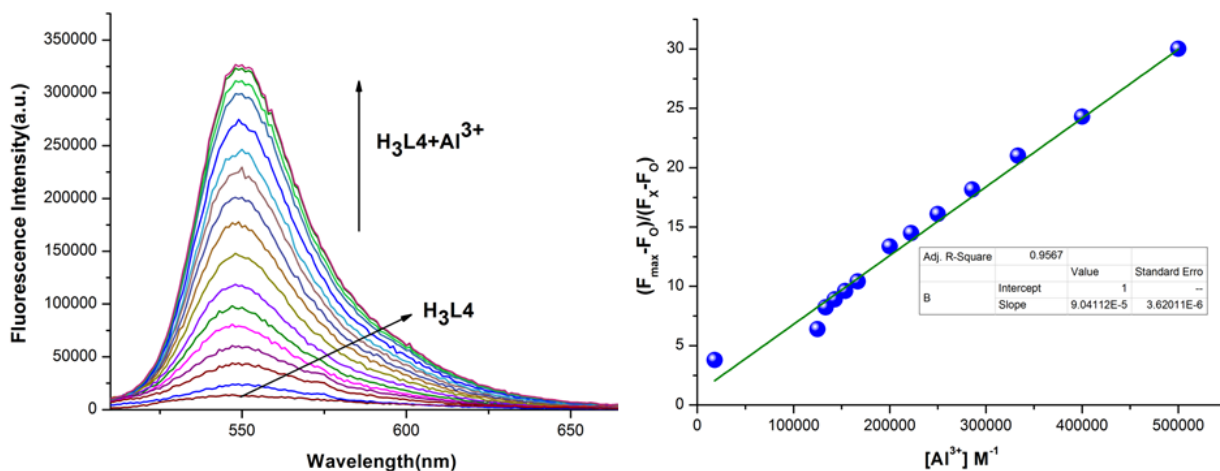

**Figure S45.** Fluorescence titration of **H<sub>3</sub>L4** (10  $\mu$ M) in THF solvent by gradual addition of  $\text{Al}^{3+}$  (0–11  $\mu$ M) with  $\lambda_{\text{ex}}= 490$  nm and corresponding Benesi-Hildebrand plot.

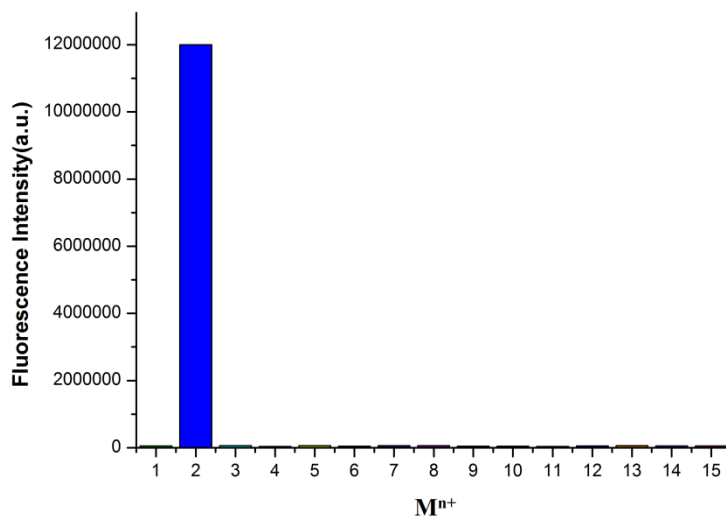

**Figure S46.** Relative fluorescence intensity diagram of chemosensor **H<sub>3</sub>L1** in the presence of different cations in HEPES buffer at pH 7.4. 1=only **H<sub>3</sub>L1** (10  $\mu$ M); **H<sub>3</sub>L1** (10  $\mu$ M) +  $\text{M}^{n+}$  (10  $\mu$ M), where  $\text{M}^{n+}=(2\text{-Al}^{3+}, 3\text{-Cu}^{2+}, 4\text{-Cr}^{3+}, 5\text{-Fe}^{3+}, 6\text{-Hg}^{2+}, 7\text{-K}^+, 8\text{-Mn}^{2+}, 9\text{-Na}^+, 10\text{-Ni}^{2+}, 11\text{-Mg}^{2+}, 12\text{-Pb}^{2+}, 13\text{-Ca}^{2+}, 14\text{-Fe}^{2+}, 15\text{-Cd}^{2+})$ .

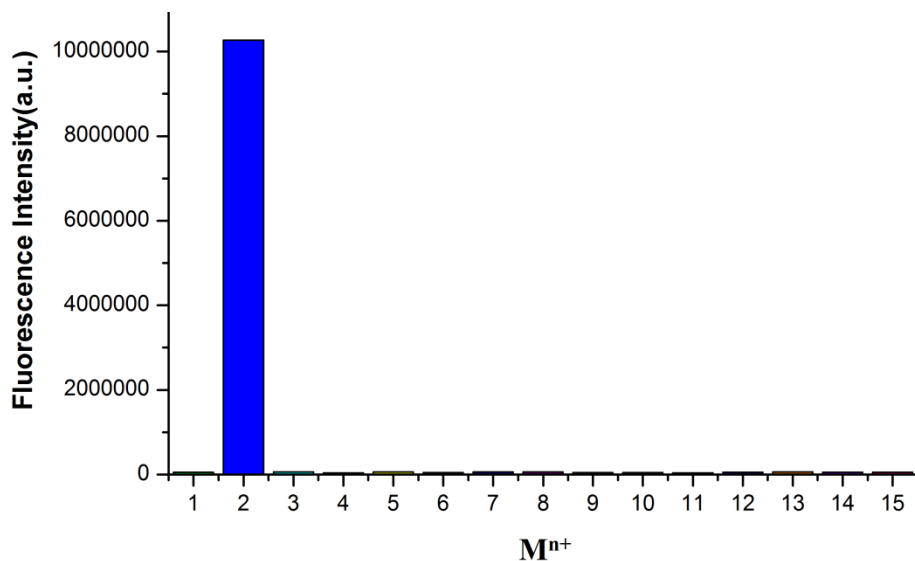

**Figure S47.** Relative fluorescence intensity diagram of chemosensor **H<sub>3</sub>L2** in the presence of different cations in HEPES buffer at pH 7.4. 1=only **H<sub>3</sub>L2** (10  $\mu$ M); **H<sub>3</sub>L2** (10  $\mu$ M) +  $M^{n+}$  (10  $\mu$ M), where  $M^{n+}$ =(2–Al<sup>3+</sup>, 3–Cu<sup>2+</sup>, 4–Cr<sup>3+</sup>, 5–Fe<sup>3+</sup>, 6–Hg<sup>2+</sup>, 7–K<sup>+</sup>, 8–Mn<sup>2+</sup>, 9–Na<sup>+</sup>, 10–Ni<sup>2+</sup>, 11–Mg<sup>2+</sup>, 12–Pb<sup>2+</sup>, 13–Ca<sup>2+</sup>, 14–Fe<sup>2+</sup>, 15–Cd<sup>2+</sup>).

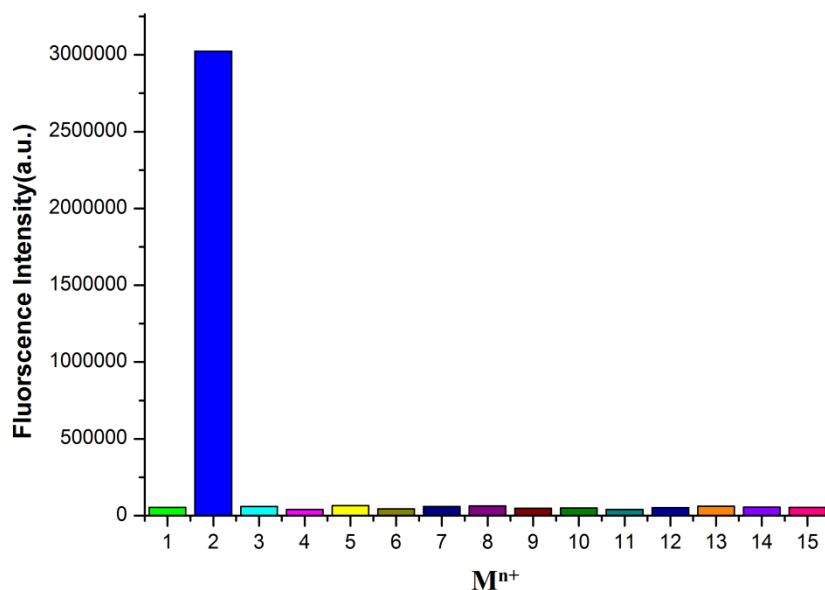

**Figure S48.** Relative fluorescence intensity diagram of chemosensor **H<sub>3</sub>L3** in the presence of different cations in HEPES buffer at pH 7.4. 1=only **H<sub>3</sub>L3** (10  $\mu$ M); **H<sub>3</sub>L3** (10  $\mu$ M) +  $M^{n+}$  (10  $\mu$ M), where  $M^{n+}$ =(2–Al<sup>3+</sup>, 3–Cu<sup>2+</sup>, 4–Cr<sup>3+</sup>, 5–Fe<sup>3+</sup>, 6–Hg<sup>2+</sup>, 7–K<sup>+</sup>, 8–Mn<sup>2+</sup>, 9–Na<sup>+</sup>, 10–Ni<sup>2+</sup>, 11–Mg<sup>2+</sup>, 12–Pb<sup>2+</sup>, 13–Ca<sup>2+</sup>, 14–Fe<sup>2+</sup>, 15–Cd<sup>2+</sup>).

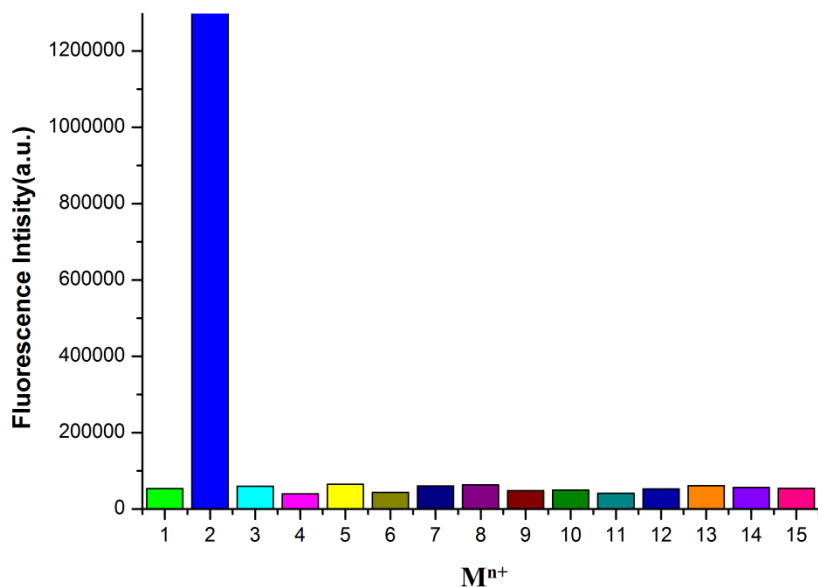

**Figure S49.** Relative fluorescence intensity diagram of chemosensor **H<sub>3</sub>L4** in the presence of different cations in HEPES buffer at pH 7.4. 1=only **H<sub>3</sub>L4** (10  $\mu$ M); **H<sub>3</sub>L4** (10  $\mu$ M) +  $M^{n+}$ (10  $\mu$ M), where  $M^{n+}$ =(2– $Al^{3+}$ , 3– $Cu^{2+}$ , 4– $Cr^{3+}$ , 5– $Fe^{3+}$ , 6– $Hg^{2+}$ , 7– $K^+$ , 8– $Mn^{2+}$ , 9– $Na^+$ , 10– $Ni^{2+}$ , 11– $Mg^{2+}$ , 12– $Pb^{2+}$ , 13– $Ca^{2+}$ , 14– $Fe^{2+}$ , 15– $Cd^{2+}$ ).

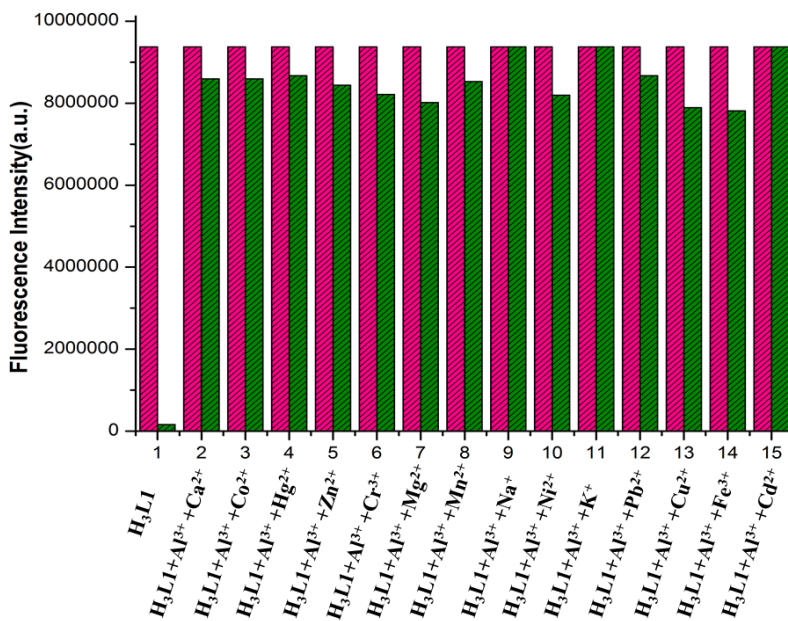

**Figure S50.** Relative fluorescence intensity diagram of [**H<sub>3</sub>L2**- $Al^{3+}$ ] system in the presence of different cations in 10 mM HEPES buffer at pH 7.4. 1=only **H<sub>3</sub>L2** and (2-15)= **H<sub>3</sub>L2** (10  $\mu$ M) +  $Al^{3+}$ (10  $\mu$ M) +  $M^{n+}$ (40 $\mu$ M), where  $M^{n+}$ =(2– $Ca^{2+}$ , 3– $Co^{2+}$ , 4– $Hg^{2+}$ , 5– $Zn^{2+}$ , 6– $Cr^{3+}$ , 7– $Mg^{2+}$ , 8– $Mn^{2+}$ , 9– $Na^+$ , 10– $Ni^{2+}$ , 11– $K^+$ , 12– $Pb^{2+}$ , 13– $Cu^{2+}$ , 14– $Fe^{3+}$ , 15– $Cd^{2+}$ ).

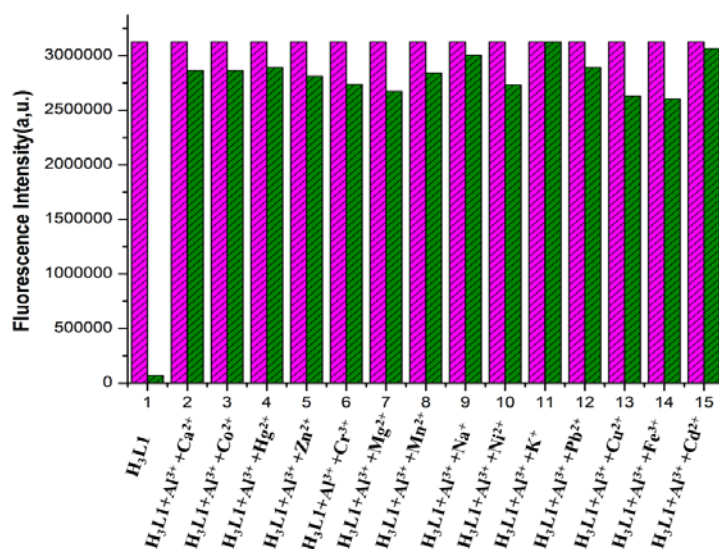

**Figure S51.** Relative fluorescence intensity diagram of  $[\text{H}_3\text{L3-Al}^{3+}]$  system in the presence of different cations in 10 mM HEPES buffer at pH 7.4. 1=only  $\text{H}_3\text{L3}$  and (2-15)=  $\text{H}_3\text{L3}$  (10  $\mu\text{M}$ ) +  $\text{Al}^{3+}$ (10  $\mu\text{M}$ ) +  $\text{M}^{n+}$ (40 $\mu\text{M}$ ), where  $\text{M}^{n+}$ =(2- $\text{Ca}^{2+}$ , 3- $\text{Co}^{2+}$ , 4- $\text{Hg}^{2+}$ , 5- $\text{Zn}^{2+}$ , 6- $\text{Cr}^{3+}$ , 7- $\text{Mg}^{2+}$ , 8- $\text{Mn}^{2+}$ , 9- $\text{Na}^+$ , 10- $\text{Ni}^{2+}$ , 11- $\text{K}^+$ , 12- $\text{Pb}^{2+}$ , 13- $\text{Cu}^{2+}$ , 14-  $\text{Fe}^{3+}$ , 15- $\text{Cd}^{2+}$ ).

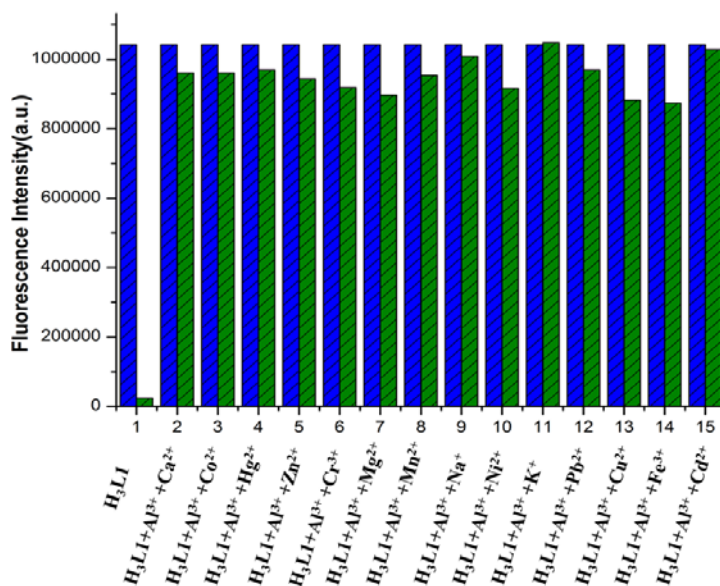

**Figure S52.** Relative fluorescence intensity diagram of  $[\text{H}_3\text{L4-Al}^{3+}]$  system in the presence of different cations in 10 mM HEPES buffer at pH 7.4. 1=only  $\text{H}_3\text{L4}$  and (2-15)=  $\text{H}_3\text{L4}$  (10  $\mu\text{M}$ ) +  $\text{Al}^{3+}$ (10  $\mu\text{M}$ ) +  $\text{M}^{n+}$ (40 $\mu\text{M}$ ), where  $\text{M}^{n+}$ =(2- $\text{Ca}^{2+}$ , 3- $\text{Co}^{2+}$ , 4- $\text{Hg}^{2+}$ , 5- $\text{Zn}^{2+}$ , 6- $\text{Cr}^{3+}$ , 7- $\text{Mg}^{2+}$ , 8- $\text{Mn}^{2+}$ , 9- $\text{Na}^+$ , 10- $\text{Ni}^{2+}$ , 11- $\text{K}^+$ , 12- $\text{Pb}^{2+}$ , 13- $\text{Cu}^{2+}$ , 14-  $\text{Fe}^{3+}$ , 15- $\text{Cd}^{2+}$ ).

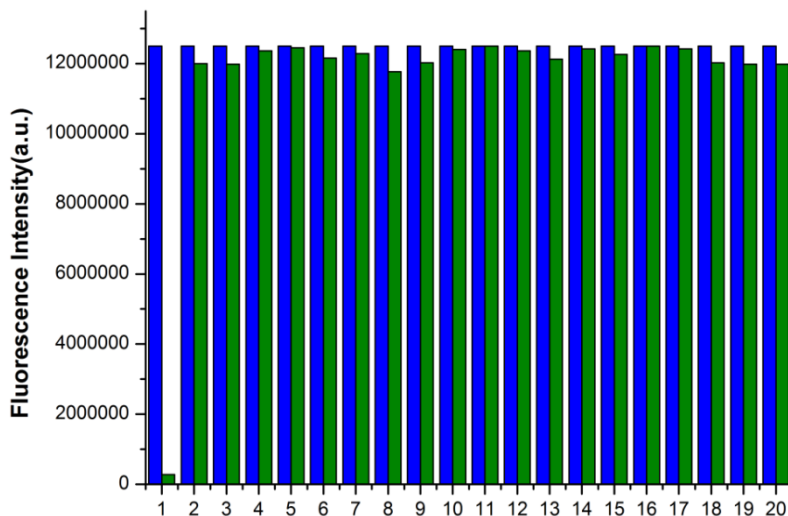

**Figure S53.** Relative fluorescence intensity diagram of  $[\text{H}_3\text{L1-Al}^{3+}]$  system in the presence of different anions in HEPES buffer medium (10 mM) at pH 7.4. 1=only  $\text{H}_3\text{L1}$  (10  $\mu\text{M}$ ) and (2-20)=  $\text{H}_3\text{L1}$  (10  $\mu\text{M}$ ) +  $\text{Al}^{3+}$ (10  $\mu\text{M}$ ) + Anions (40  $\mu\text{M}$ ), Anions = 2- $\text{S}_2\text{O}_3^{2-}$ , 3- $\text{S}^{2-}$ , 4- $\text{SO}_3^{2-}$ , 5-  $\text{HSO}_4^-$ , 6-  $\text{SO}_4^{2-}$ , 7- $\text{SCN}^-$ , 8- $\text{N}_3^-$ , 9- $\text{OCN}^-$ , 10- $\text{AsO}_4^{3-}$ ,11- $\text{H}_2\text{PO}_4^-$ , 12- $\text{HPO}_4^{2-}$ , 13- $\text{PO}_4^{3-}$ , 14- $\text{ClO}_4^-$ , 15- $\text{AcO}^-$ , 16- $\text{NO}_3^-$ , 17- $\text{F}^-$ , 18-  $\text{Cl}^-$ , 19- $\text{PF}_6^-$ , 20- $\text{P}_2\text{O}_7^{4-}$ .

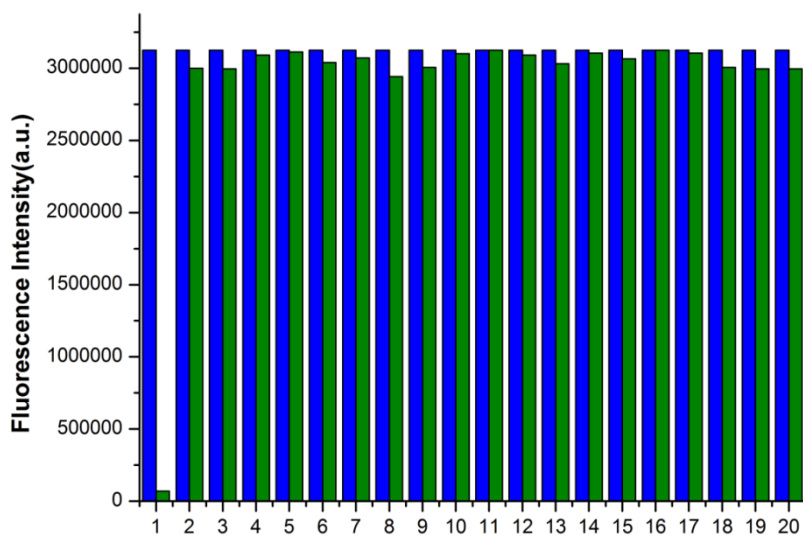

**Figure S54.** Relative fluorescence intensity diagram of  $[\text{H}_3\text{L2-Al}^{3+}]$  system in the presence of different anions in HEPES buffer medium (10 mM) at pH 7.4. 1=only  $\text{H}_3\text{L2}$  (10  $\mu\text{M}$ ) and (2-20)=  $\text{H}_3\text{L2}$  (10  $\mu\text{M}$ ) +  $\text{Al}^{3+}$ (10  $\mu\text{M}$ ) + Anions (40  $\mu\text{M}$ ), Anions = 2- $\text{S}_2\text{O}_3^{2-}$ , 3- $\text{S}^{2-}$ , 4- $\text{SO}_3^{2-}$ , 5-  $\text{HSO}_4^-$ , 6-  $\text{SO}_4^{2-}$ , 7- $\text{SCN}^-$ , 8- $\text{N}_3^-$ , 9- $\text{OCN}^-$ , 10- $\text{AsO}_4^{3-}$ ,11- $\text{H}_2\text{PO}_4^-$ , 12- $\text{HPO}_4^{2-}$ , 13- $\text{PO}_4^{3-}$ , 14- $\text{ClO}_4^-$ , 15- $\text{AcO}^-$ , 16- $\text{NO}_3^-$ , 17- $\text{F}^-$ , 18-  $\text{Cl}^-$ , 19- $\text{PF}_6^-$ , 20- $\text{P}_2\text{O}_7^{4-}$

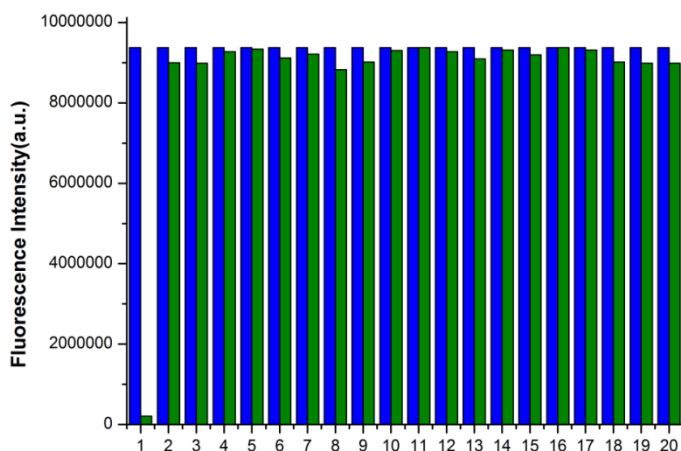

**Figure S55.** Relative fluorescence intensity diagram of  $[\text{H}_3\text{L3-Al}^{3+}]$  system in the presence of different anions in HEPES buffer medium (10 mM) at pH 7.4. 1=only  $\text{H}_3\text{L3}$  (10  $\mu\text{M}$ ) and (2-20)=  $\text{H}_3\text{L3}$  (10  $\mu\text{M}$ ) +  $\text{Al}^{3+}$ (10  $\mu\text{M}$ ) + Anions (40  $\mu\text{M}$ ), Anions = 2- $\text{S}_2\text{O}_3^{2-}$ , 3- $\text{S}^{2-}$ , 4- $\text{SO}_3^{2-}$ , 5- $\text{HSO}_4^-$ , 6-  $\text{SO}_4^{2-}$ , 7- $\text{SCN}^-$ , 8- $\text{N}_3^-$ , 9- $\text{OCN}^-$ , 10- $\text{AsO}_4^{3-}$ ,11- $\text{H}_2\text{PO}_4^-$ , 12- $\text{HPO}_4^{2-}$ , 13- $\text{PO}_4^{3-}$ , 14- $\text{ClO}_4^-$ , 15- $\text{AcO}^-$ , 16- $\text{NO}_3^-$ , 17- $\text{F}^-$ , 18-  $\text{Cl}^-$ , 19- $\text{PF}_6^-$ , 20- $\text{P}_2\text{O}_7^{4-}$ .

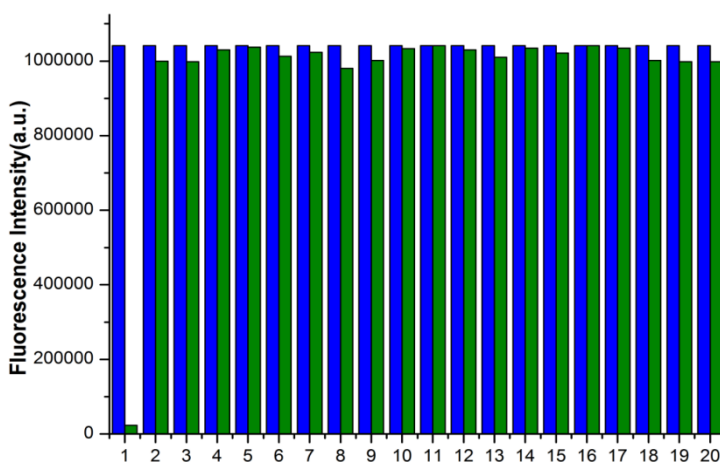

**Figure S56.** Relative fluorescence intensity diagram of  $[\text{H}_3\text{L4-Al}^{3+}]$  system in the presence of different anions in HEPES buffer medium (10 mM) at pH 7.4. 1=only  $\text{H}_3\text{L4}$  (10  $\mu\text{M}$ ) and (2-20)=  $\text{H}_3\text{L4}$  (10  $\mu\text{M}$ ) +  $\text{Al}^{3+}$ (10  $\mu\text{M}$ ) + Anions (40  $\mu\text{M}$ ), Anions = 2- $\text{S}_2\text{O}_3^{2-}$ , 3- $\text{S}^{2-}$ , 4- $\text{SO}_3^{2-}$ , 5- $\text{HSO}_4^-$ , 6-  $\text{SO}_4^{2-}$ , 7- $\text{SCN}^-$ , 8- $\text{N}_3^-$ , 9- $\text{OCN}^-$ , 10- $\text{AsO}_4^{3-}$ ,11- $\text{H}_2\text{PO}_4^-$ , 12- $\text{HPO}_4^{2-}$ , 13- $\text{PO}_4^{3-}$ , 14- $\text{ClO}_4^-$ , 15- $\text{AcO}^-$ , 16- $\text{NO}_3^-$ , 17- $\text{F}^-$ , 18-  $\text{Cl}^-$ , 19- $\text{PF}_6^-$ , 20- $\text{P}_2\text{O}_7^{4-}$ .



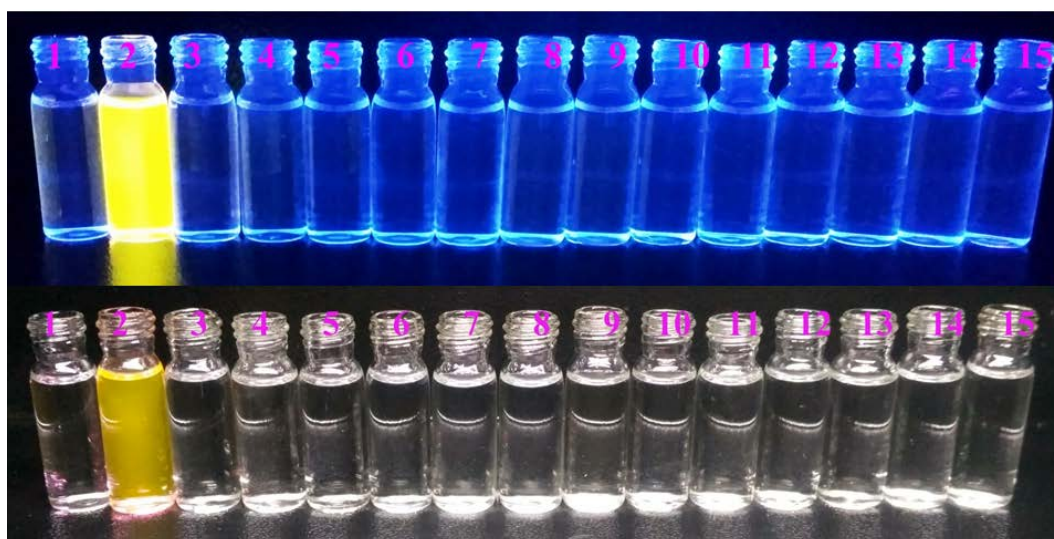

**Figure S57.** Visual colour changes of chemosensor  $\text{H}_3\text{L}_2$  ( $10\mu\text{M}$ ) in presence of common metal ions (1equivalent) in 10 mM HEPES buffer (pH 7.4). The images in below row and above row were taken under visible light and UV light respectively. Where 1= only  $\text{H}_3\text{L}_2$ , 2-15=  $\text{H}_3\text{L}_2$ + different metal ions ( $\text{Al}^{3+}$ ,  $\text{Cu}^{2+}$ ,  $\text{Cd}^{2+}$ ,  $\text{Pb}^{2+}$ ,  $\text{Hg}^{2+}$ ,  $\text{Mn}^{2+}$ ,  $\text{Fe}^{3+}$ ,  $\text{Co}^{2+}$ ,  $\text{Ni}^{2+}$ ,  $\text{K}^+$ ,  $\text{Na}^+$ ,  $\text{Mg}^{2+}$ ,  $\text{Ca}^{2+}$  and  $\text{Zn}^{2+}$  respectively).

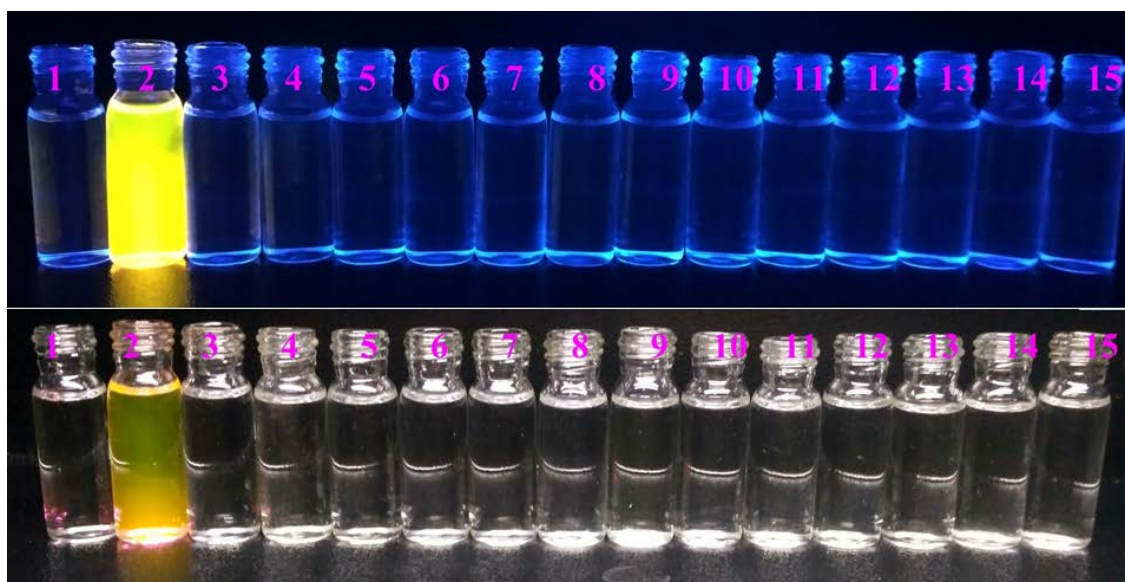

**Figure S58.** Visual colour changes of chemosensor  $\text{H}_3\text{L}_3$  ( $10\mu\text{M}$ ) in presence of common metal ions (1equivalent) in 10 mM HEPES buffer (pH 7.4). The images in below row and above row were taken under visible light and UV light respectively. Where 1= only  $\text{H}_3\text{L}_3$ , 2-15=  $\text{H}_3\text{L}_3$ + different metal ions ( $\text{Al}^{3+}$ ,  $\text{Cu}^{2+}$ ,  $\text{Cd}^{2+}$ ,  $\text{Pb}^{2+}$ ,  $\text{Hg}^{2+}$ ,  $\text{Mn}^{2+}$ ,  $\text{Fe}^{3+}$ ,  $\text{Co}^{2+}$ ,  $\text{Ni}^{2+}$ ,  $\text{K}^+$ ,  $\text{Na}^+$ ,  $\text{Mg}^{2+}$ ,  $\text{Ca}^{2+}$  and  $\text{Zn}^{2+}$  respectively).

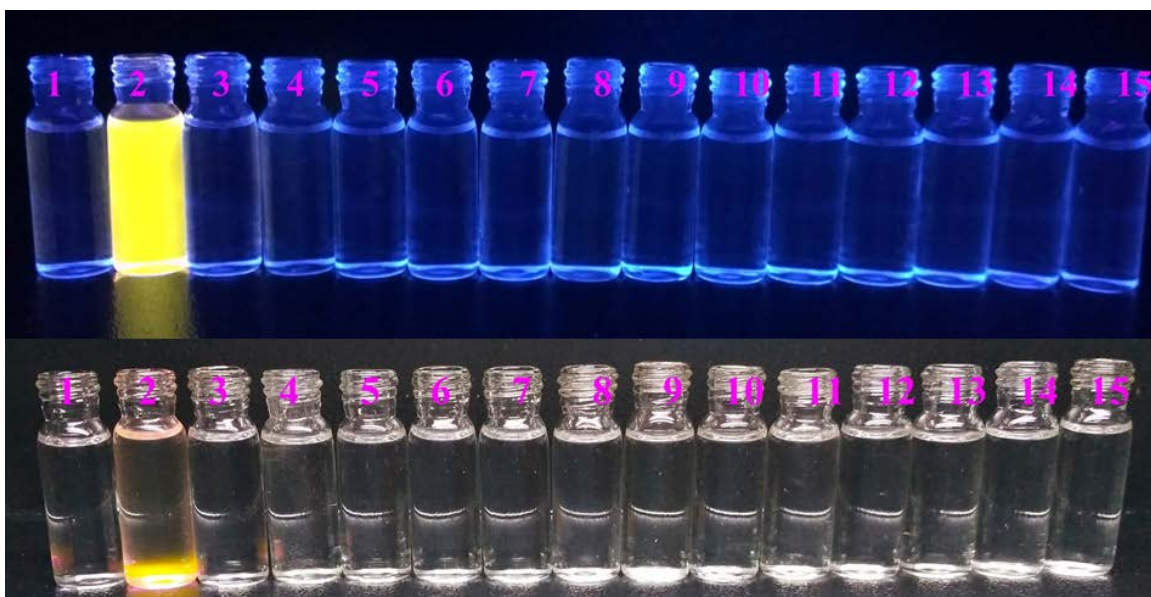

**Figure S59.** Visual colour changes of chemosensor  $\text{H}_3\text{L4}$  ( $10\mu\text{M}$ ) in presence of common metal ions (1equivalent) in 10 mM HEPES buffer (pH 7.4). The images in below row and above row were taken under visible light and UV light respectively. Where 1= only  $\text{H}_3\text{L4}$ , 2-15=  $\text{H}_3\text{L4}$ + different metal ions ( $\text{Al}^{3+}$ ,  $\text{Cu}^{2+}$ ,  $\text{Cd}^{2+}$ ,  $\text{Pb}^{2+}$ ,  $\text{Hg}^{2+}$ ,  $\text{Mn}^{2+}$ ,  $\text{Fe}^{3+}$ ,  $\text{Co}^{2+}$ ,  $\text{Ni}^{2+}$ ,  $\text{K}^+$ ,  $\text{Na}^+$ ,  $\text{Mg}^{2+}$ ,  $\text{Ca}^{2+}$  and  $\text{Zn}^{2+}$  respectively).

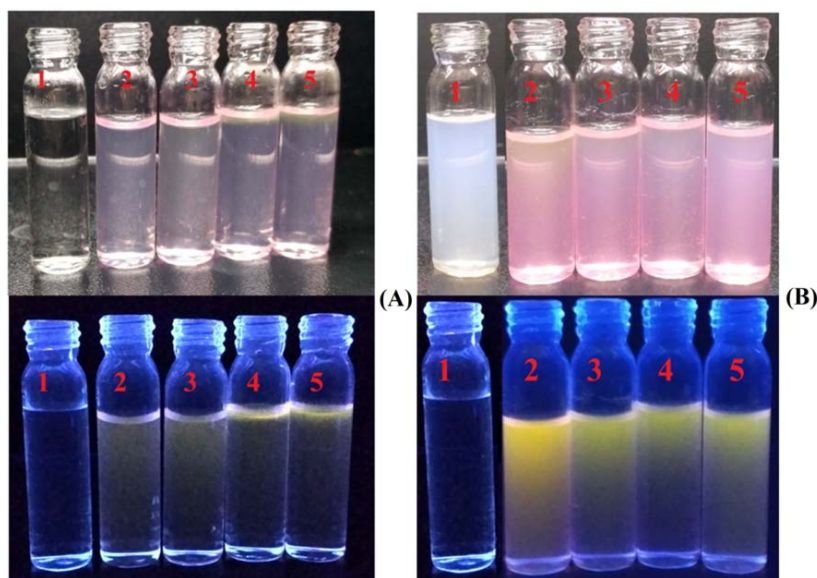

**Figure S60.** Visual colour changes of real samples under normal light (above) and UV lamp (below) in presence of chemosensors ( $\text{H}_3\text{L1}$ -  $\text{H}_3\text{L4}$ ). (A) Laboratory tap water (1= Only laboratory tap water, 2-5=laboratory tap water +  $\text{H}_3\text{L1}$ -  $\text{H}_3\text{L4}$ ). (B) Saloon waste water, (1= Only saloon waste water, 2-5= Saloon waste water +  $\text{H}_3\text{L1}$ -  $\text{H}_3\text{L4}$ ).



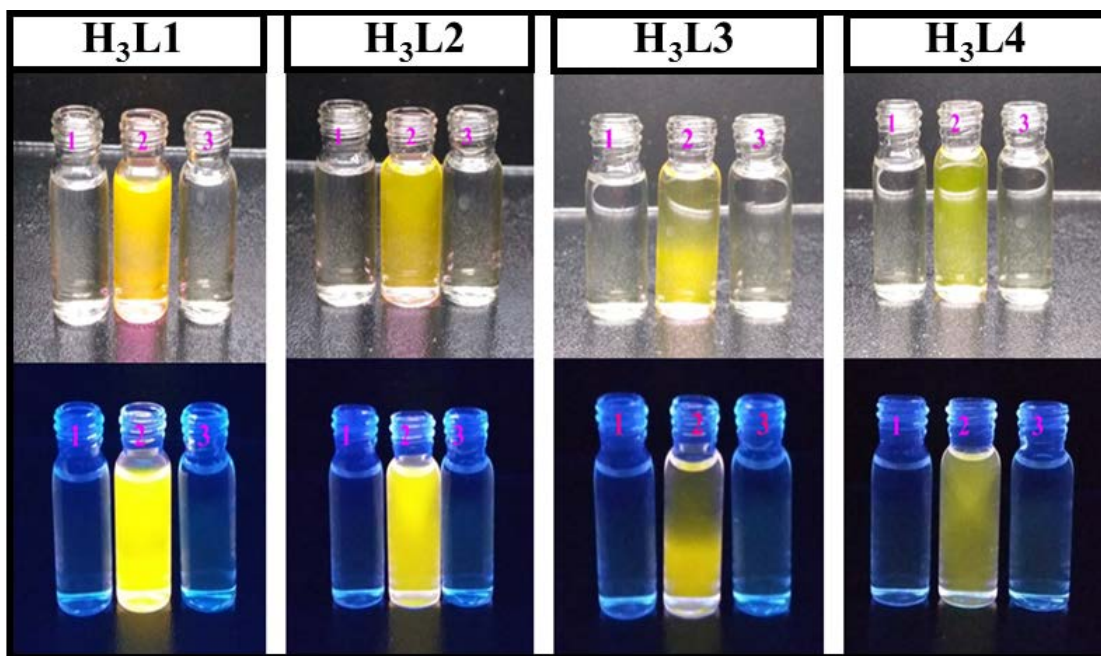

**Figure S61.** Visual colour changes in reversibility experiments. For **H<sub>3</sub>L1-H<sub>3</sub>L4**, 1= Only **H<sub>3</sub>L1-H<sub>3</sub>L4** (10 $\mu$ M), 2= **H<sub>3</sub>L1-H<sub>3</sub>L4** (10 $\mu$ M) + **Al<sup>3+</sup>**(10 $\mu$ M), 3= **H<sub>3</sub>L1-H<sub>3</sub>L4** (10 $\mu$ M) + **Al<sup>3+</sup>**(10 $\mu$ M) + **EDTA<sup>2-</sup>**(10 $\mu$ M) under UV and normal light, respectively.

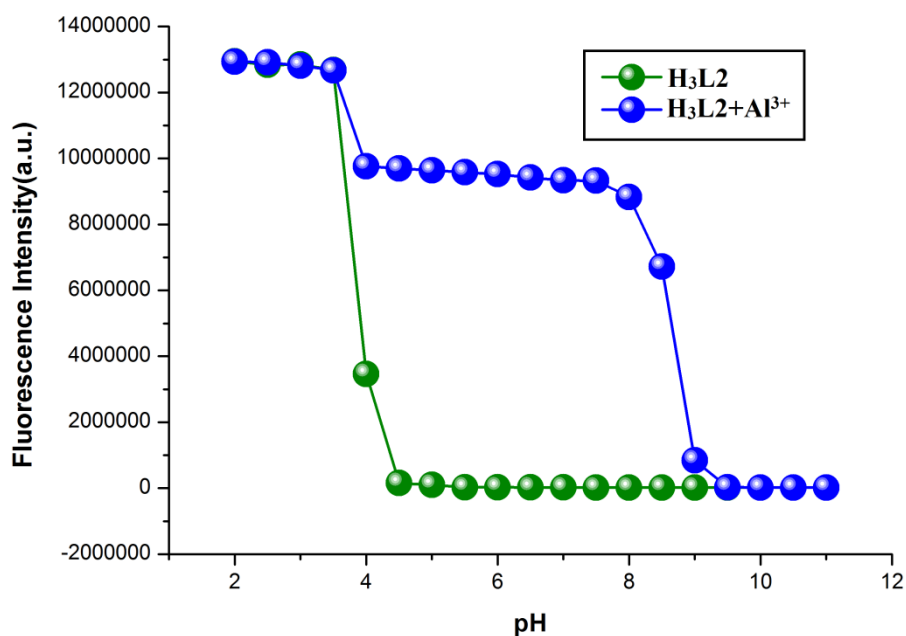

**Figure S62.** Fluorescence intensity of **H<sub>3</sub>L2** (10  $\mu$ M) in the absence and presence of **Al<sup>3+</sup>** ions (10  $\mu$ M) at various pH values in 10 mM HEPES buffer.

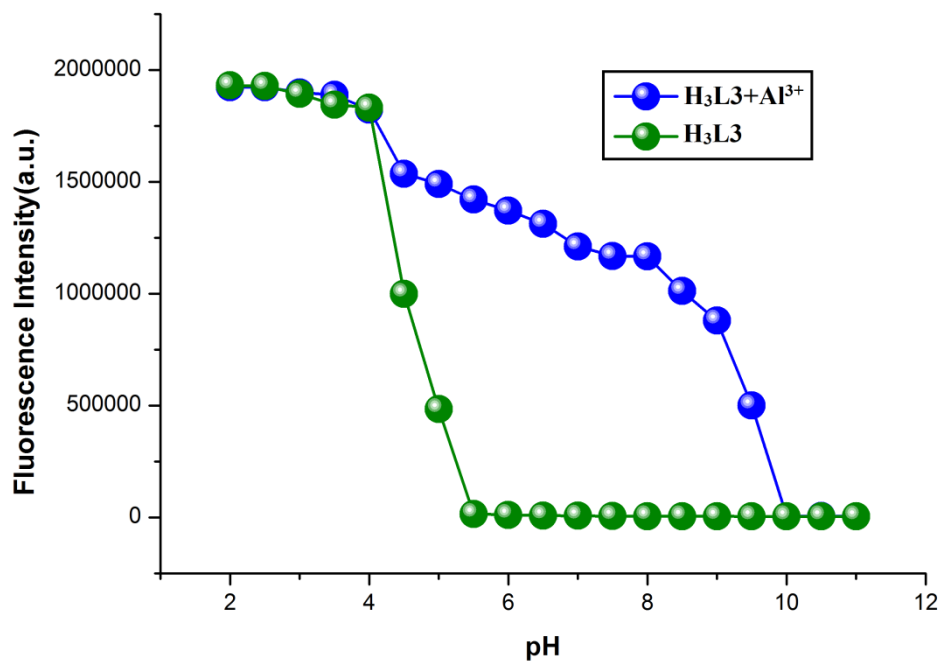

**Figure S63.** Fluorescence intensity of **H<sub>3</sub>L3** (10 μM) in the absence and presence of Al<sup>3+</sup> ions (10 μM) at various pH values in 10 mM HEPES buffer.

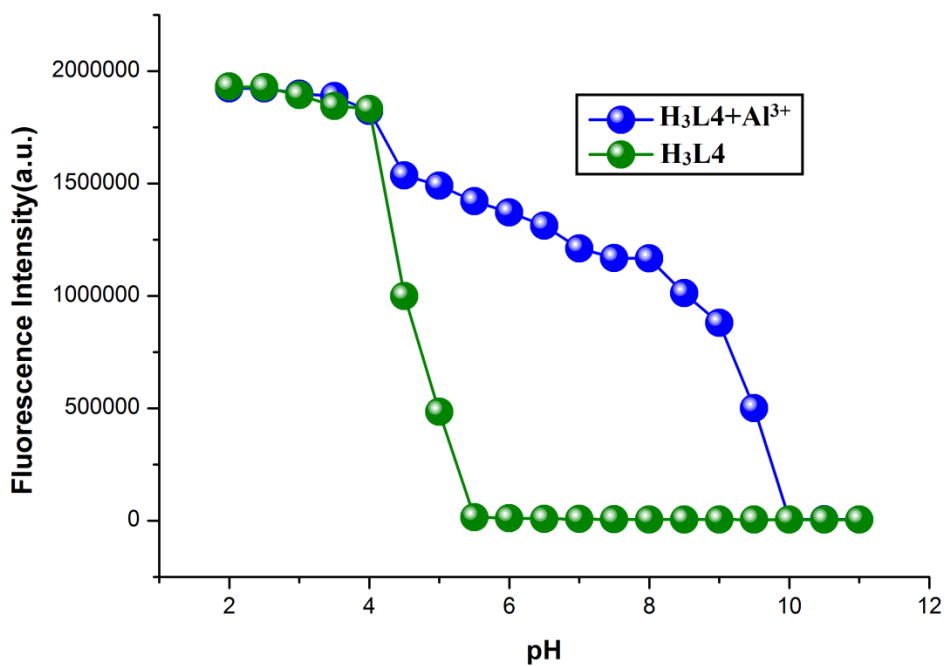

**Figure S64.** Fluorescence intensity of **H<sub>3</sub>L4** (10 μM) in the absence and presence of Al<sup>3+</sup> ions (10 μM) at various pH values in 10 mM HEPES buffer.

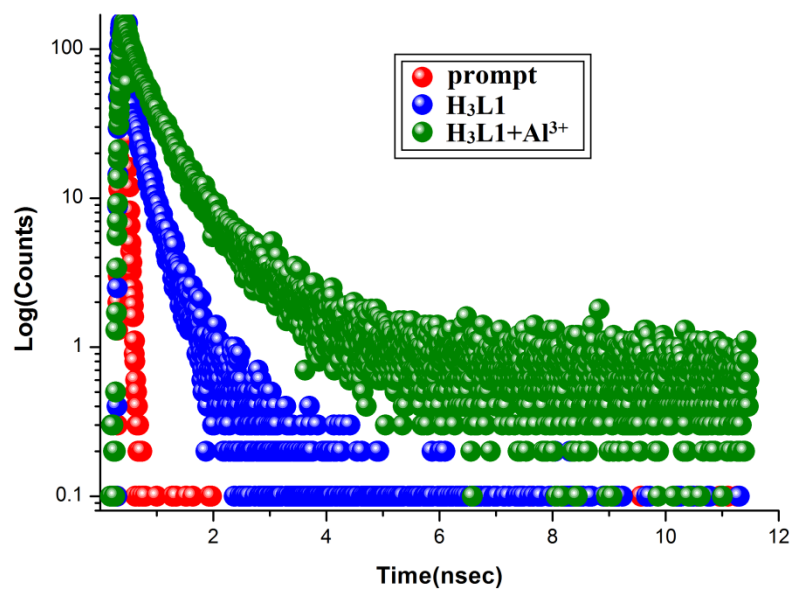

**Figure S65.** Time-resolved fluorescence decay curves (logarithm of normalized intensity vs time in ns) of **H<sub>3</sub>L1** in the absence (●) and presence (●) of Al<sup>3+</sup> ion, (●) indicates decay curve for the scattered.

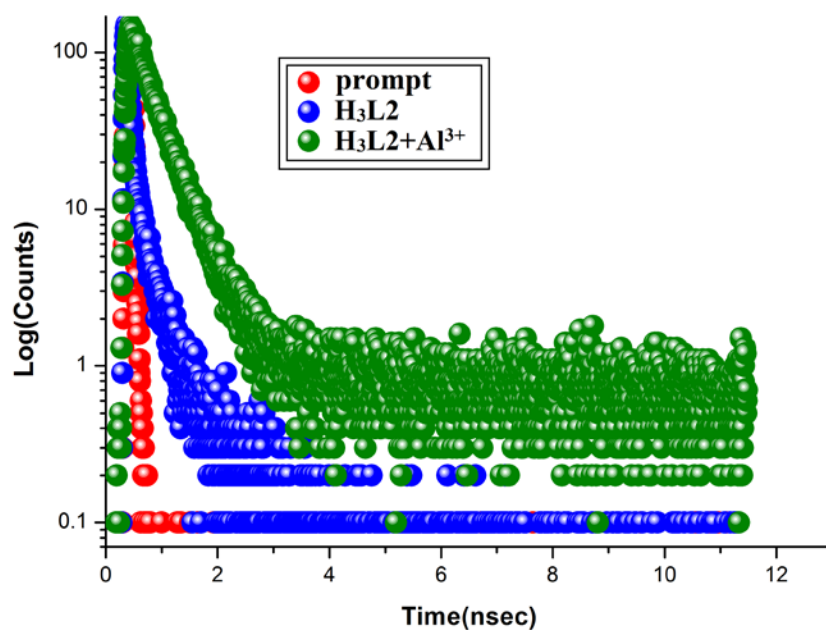

**Figure S66.** Time-resolved fluorescence decay curves (logarithm of normalized intensity vs time in ns) of **H<sub>3</sub>L2** in the absence (●) and presence (●) of Al<sup>3+</sup> ion, (●) indicates decay curve for the scattered.

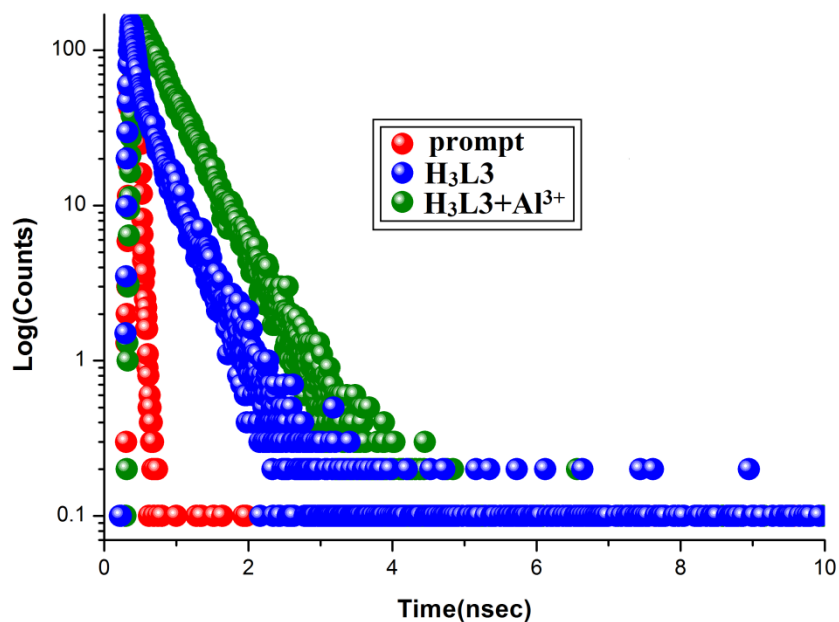

**Figure S67.** Time-resolved fluorescence decay curves (logarithm of normalized intensity vs time in ns) of **H<sub>3</sub>L3** in the absence (●) and presence (●) of  $\text{Al}^{3+}$  ion, (● indicates decay curve for the scattered.

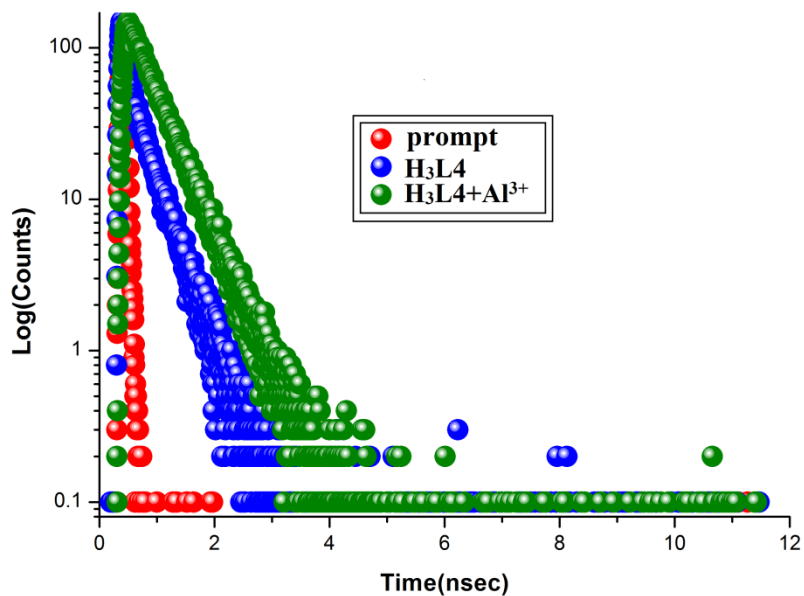

**Figure S68.** Time-resolved fluorescence decay curves (logarithm of normalized intensity vs time in ns) of **H<sub>3</sub>L4** in the absence (●) and presence (●) of  $\text{Al}^{3+}$  ion, (● indicates decay curve for the scattered.

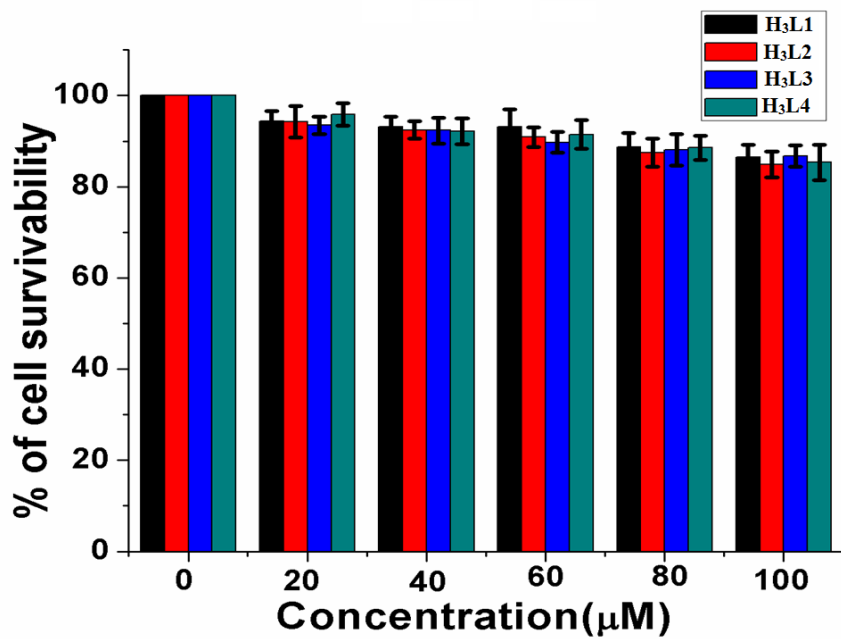

Figure S69. Survivability of WI38 cells exposed to H<sub>3</sub>L1-H<sub>3</sub>L4.

|        | H <sub>3</sub> L1                                                                   | H <sub>3</sub> L2                                                                   | H <sub>3</sub> L3                                                                    | H <sub>3</sub> L4                                                                     |
|--------|-------------------------------------------------------------------------------------|-------------------------------------------------------------------------------------|--------------------------------------------------------------------------------------|---------------------------------------------------------------------------------------|
| LUMO+2 |    |    |    |    |
| LUMO+1 |    |    |    |    |
| LUMO   |    |    |    |    |
| HOMO   |  |  |  |   |
| HOMO-1 |  |  |  |  |
| HOMO-2 |  |  |  |  |

Figure S70. Selected contour plots of molecular orbitals of H<sub>3</sub>L1-H<sub>3</sub>L4.

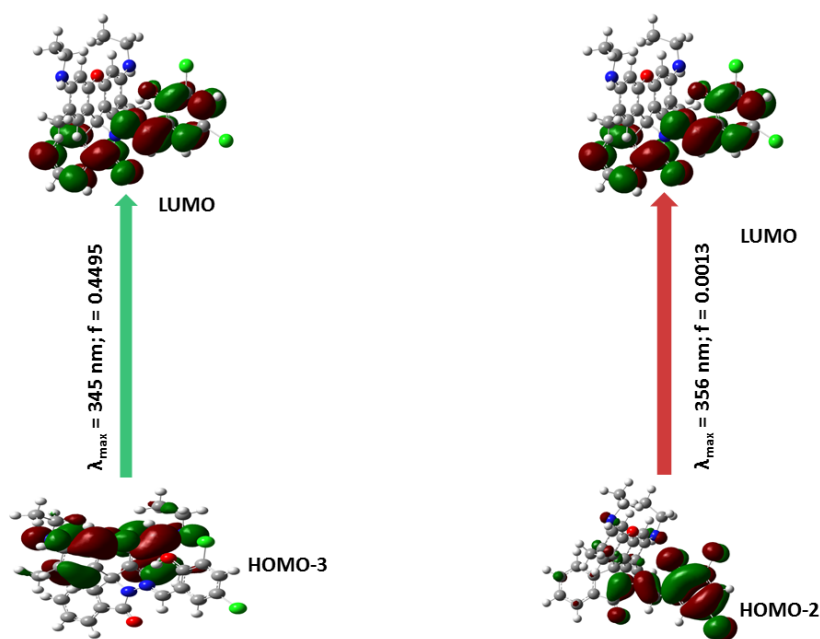

**Figure S71.** Pictorial representation of key transitions involved in UV-Vis absorption of chemosensor H<sub>3</sub>L<sub>2</sub>.

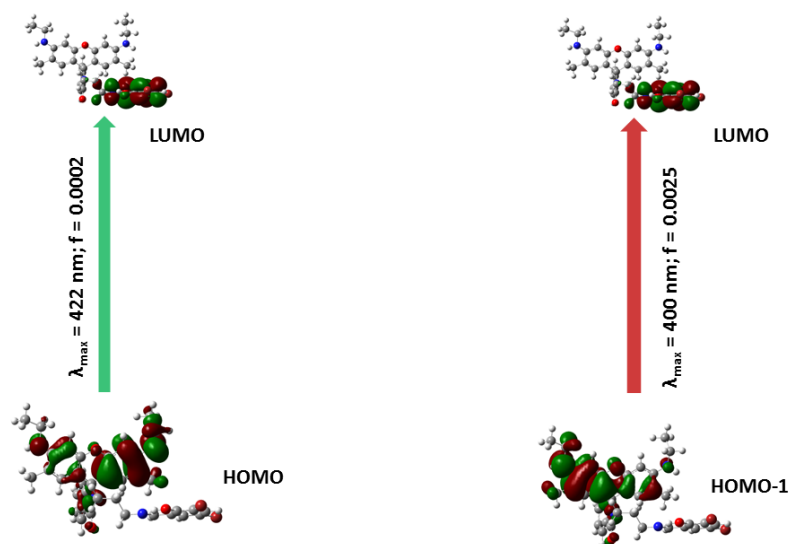

**Figure S72.** Pictorial representation of key transitions involved in UV-Vis absorption of chemosensor H<sub>3</sub>L<sub>3</sub>.

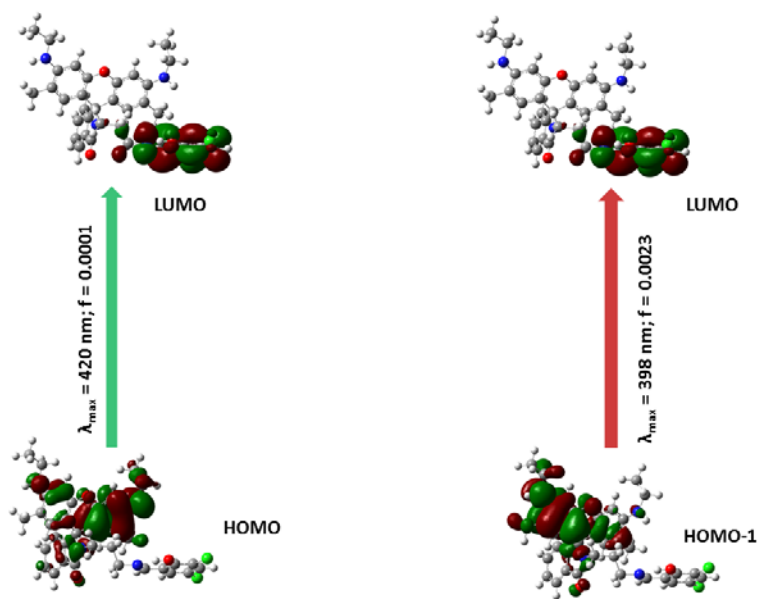

**Figure S73.** Pictorial representation of key transitions involved in UV-Vis absorption of chemosensor **H<sub>3</sub>L<sub>4</sub>**.



**Table S1.** Crystal parameters and selected refinement details for the chemosensors (**H<sub>3</sub>L1-H<sub>3</sub>L4**).

| Complex                                                     | <b>H<sub>3</sub>L1</b>                                                        | <b>H<sub>3</sub>L2</b>                                                        | <b>H<sub>3</sub>L3</b>                                                        | <b>H<sub>3</sub>L4</b>                                                        |
|-------------------------------------------------------------|-------------------------------------------------------------------------------|-------------------------------------------------------------------------------|-------------------------------------------------------------------------------|-------------------------------------------------------------------------------|
| Empirical formula                                           | C <sub>33</sub> H <sub>30</sub> Br <sub>2</sub> N <sub>4</sub> O <sub>3</sub> | C <sub>33</sub> H <sub>30</sub> Cl <sub>2</sub> N <sub>4</sub> O <sub>3</sub> | C <sub>36</sub> H <sub>36</sub> Br <sub>2</sub> N <sub>4</sub> O <sub>3</sub> | C <sub>36</sub> H <sub>36</sub> Cl <sub>2</sub> N <sub>4</sub> O <sub>3</sub> |
| Formula weight                                              | 690.43                                                                        | 601.51                                                                        | 732.51                                                                        | 643.59                                                                        |
| Temperature (K)                                             | 273(2)                                                                        | 273(2)                                                                        | 273(2)                                                                        | 273(2)                                                                        |
| Crystal system                                              | triclinic                                                                     | triclinic                                                                     | monoclinic                                                                    | monoclinic                                                                    |
| Space group                                                 | <i>P</i> -1                                                                   | <i>P</i> -1                                                                   | <i>P</i> 2 <sub>1</sub> / <i>c</i>                                            | <i>P</i> 2 <sub>1</sub> / <i>c</i>                                            |
| <i>a</i> (Å)                                                | 9.5600(16)                                                                    | 9.5793(10)                                                                    | 13.6753(18)                                                                   | 13.513(2)                                                                     |
| <i>b</i> (Å)                                                | 12.335(2)                                                                     | 12.2135(12)                                                                   | 9.5139(12)                                                                    | 9.3806(17)                                                                    |
| <i>c</i> (Å)                                                | 13.635(2)                                                                     | 13.5543(14)                                                                   | 26.448(4)                                                                     | 25.521(5)                                                                     |
| $\alpha$ (°)                                                | 92.659(4)                                                                     | 92.238(3)                                                                     | 90                                                                            | 90                                                                            |
| $\beta$ (°)                                                 | 106.547(4)                                                                    | 107.023(3)                                                                    | 97.271(4)                                                                     | 94.479(6)                                                                     |
| $\gamma$ (°)                                                | 95.976(4)                                                                     | 96.087(3)                                                                     | 90                                                                            | 90                                                                            |
| Volume (Å <sup>3</sup> )                                    | 1528.1(4)                                                                     | 1503.7(3)                                                                     | 3413.4(8)                                                                     | 3225.2(10)                                                                    |
| <i>Z</i>                                                    | 2                                                                             | 2                                                                             | 4                                                                             | 4                                                                             |
| <i>D</i> <sub>calc</sub> (g cm <sup>-3</sup> )              | 1.501                                                                         | 1.329                                                                         | 1.425                                                                         | 1.325                                                                         |
| Absorption coefficient (mm <sup>-1</sup> )                  | 2.693                                                                         | 0.257                                                                         | 2.415                                                                         | 0.244                                                                         |
| <i>F</i> (000)                                              | 700                                                                           | 628                                                                           | 1496                                                                          | 1352                                                                          |
| $\theta$ Range for data collection (°)                      | 27.126- 2.191                                                                 | 27.257- 2.322                                                                 | 25.08-2.98                                                                    | 2.286-27.285                                                                  |
| Reflections collected                                       | 69311                                                                         | 49439                                                                         | 49611                                                                         | 28853                                                                         |
| Independent reflection / <i>R</i> <sub>int</sub>            | 4237/0.0845                                                                   | 5048/ 0.0335                                                                  | 2356/0.1199                                                                   | 5615/0.1020                                                                   |
| Data / restraints / parameters                              | 6741/ 0/ 396                                                                  | 6688/0/ 383                                                                   | 7514/0/414                                                                    | 7061/0/406                                                                    |
| Goodness-of-fit on <i>F</i> <sup>2</sup>                    | 1.040                                                                         | 1.028                                                                         | 1.025                                                                         | 1.110                                                                         |
| Final <i>R</i> indices [ <i>I</i> >2 $\sigma$ ( <i>I</i> )] | <i>R</i> 1 = 0.0678, <i>wR</i> 2 = 0.1662                                     | <i>R</i> 1 = 0.0889, <i>wR</i> 2 = 0.2717                                     | <i>R</i> 1 = 0.1080, <i>wR</i> 2 = 0.2952                                     | <i>R</i> 1 = 0.1981, <i>wR</i> 2 = 0.5034                                     |
| <i>R</i> indices (all data)                                 | <i>R</i> 1 = 0.1127, <i>wR</i> 2 = 0.1915                                     | <i>R</i> 1 = 0.1093, <i>wR</i> 2 = 0.2983                                     | <i>R</i> 1 = 0.2709, <i>wR</i> 2 = 0.4043                                     | <i>R</i> 1 = 0.2126, <i>wR</i> 2 = 0.5103                                     |
| Largest diff. peak / hole (e Å <sup>-3</sup> )              | 1.692/ -1.177                                                                 | 1.351/ -0.687                                                                 | 1.248/ -1.204                                                                 | 1.001/-0.882                                                                  |

**Table S2.** Selected Bond lengths (Å) and Bond angles (°) for **H<sub>3</sub>L1** and **H<sub>3</sub>L2**.

| <b>H<sub>3</sub>L1</b> | X-ray     | Calculated | <b>H<sub>3</sub>L2</b> | X-ray    | Calculated |
|------------------------|-----------|------------|------------------------|----------|------------|
| O1-C6                  | 1.377(6)  | 1.368      | O1-C12                 | 1.378(4) | 1.371      |
| O1-C18                 | 1.383(5)  | 1.368      | O1-C5                  | 1.381(4) | 1.371      |
| O2-C32                 | 1.204(6)  | 1.224      | O3-C26                 | 1.217(4) | 1.225      |
| O3-C11                 | 1.321(6)  | 1.345      | N1-N2                  | 1.376(4) | 1.355      |
| N1-N2                  | 1.381(6)  | 1.356      | N1-C26                 | 1.377(4) | 1.392      |
| N1-C32                 | 1.384(6)  | 1.290      | N1-C10                 | 1.497(4) | 1.513      |
| N1-C8                  | 1.488(6)  | 1.517      | N2-C27                 | 1.274(5) | 1.296      |
| N2-C9                  | 1.256(7)  | 1.396      | N3-C14                 | 1.372(4) | 1.387      |
| N3-C16                 | 1.361(6)  | 1.314      | N3-C18                 | 1.438(5) | 1.456      |
| N3-C15                 | 1.438(7)  | 1.445      | N4-C2                  | 1.441(7) | 1.456      |
| N4-C4                  | 1.381(7)  | 1.314      | N4-C3                  | 1.385(5) | 1.386      |
| N4-C2                  | 1.455(10) | 1.448      | N1-C10-C6              | 111.5(2) | 111.78     |
| N1-C8-C19              | 110.9(3)  | 107.47     | N1-C10-C11             | 110.6(2) | 110.58     |
| N1-C8-C26              | 99.4(3)   | 100.02     | C6-C10-C11             | 110.7(2) | 110.40     |
| C19-C8-C26             | 111.6(4)  | 111.17     | N1-C10-C20             | 99.4(2)  | 99.60      |
| N1-C8-C7               | 111.5(4)  | 111.09     | C6-C10-C20             | 112.5(2) | 112.70     |
| C19-C8-C7              | 110.9(4)  | 107.47     | C1-C10-C20             | 111.7(3) | 112.07     |
| C26-C8-C7              | 112.1(4)  | 113.54     |                        |          |            |

**Table S3.** Selected Bond lengths (Å) and Bond angles (°) for **H<sub>3</sub>L3** and **H<sub>3</sub>L4**.

| <b>H<sub>3</sub>L3</b> | X-ray     | Calculated | <b>H<sub>3</sub>L4</b> | X-ray     | Calculated |
|------------------------|-----------|------------|------------------------|-----------|------------|
| O1-C2                  | 1.339(13) | 1.332      | O1-C20                 | 1.383(11) | 1.372      |
| O2-C11                 | 1.228(14) | 1.227      | O1-C21                 | 1.407(11) | 1.372      |
| O3-C25                 | 1.381(9)  | 1.372      | O2-C37                 | 1.221(13) | 1.227      |
| O3-C31                 | 1.381(9)  | 1.372      | O3-C3                  | 1.340(14) | 1.332      |
| N1-C7                  | 1.257(12) | 1.281      | N1-C9                  | 1.446(13) | 1.455      |
| N1-C8                  | 1.479(13) | 1.456      | N1-C10                 | 1.497(11) | 1.498      |
| N2-C11                 | 1.394(15) | 1.382      | N1-C37                 | 1.375(13) | 1.378      |
| N2-C10                 | 1.440(13) | 1.455      | N2-C14                 | 1.376(12) | 1.387      |
| N2-C18                 | 1.489(11) | 1.498      | N2-C15                 | 1.435(15) | 1.455      |
| N3-C23                 | 1.375(11) | 1.387      | N3-C25                 | 1.379(12) | 1.382      |
| N3-C33                 | 1.500(16) | 1.459      | N3-C26                 | 1.432(13) | 1.456      |
| N4-C29                 | 1.364(12) | 1.374      | N4-C5                  | 1.245(16) | 1.281      |
| N4-C35                 | 1.450(14) | 1.456      | N4-C7                  | 1.485(15) | 1.456      |
| N2-C18 C19             | 112.3(6)  | 112.86     | N1-C10-C11             | 110.2(7)  | 111.96     |
| N2-C18 C17             | 99.3(7)   | 100.23     | N1-C10-C22             | 111.1(7)  | 111.46     |
| C19-C18-C17            | 111.1(7)  | 111.98     | N1-C10-C31             | 101.0(7)  | 100.23     |
| N2-C18-C26             | 110.4(7)  | 110.94     | C22-C10-C31            | 111.1(8)  | 111.98     |
| C17-C18-C26            | 112.4(7)  | 111.96     | C31-C10-C11            | 112.6(7)  | 112.02     |
| C19-C18-C26            | 110.8(7)  | 111.45     | C22-C10-C11            | 110.5(7)  | 110.94     |

**Table S4.** Binding constant values of chemosensors in presence of Al<sup>3+</sup> ions in different solvent system.

| Chemosensors           | Binding constant in 9:1 water: methanol (v/v) medium(M <sup>-1</sup> ) | Binding constant in THF medium(M <sup>-1</sup> ) |
|------------------------|------------------------------------------------------------------------|--------------------------------------------------|
| <b>H<sub>3</sub>L1</b> | 8.00×10 <sup>5</sup>                                                   | 6.84×10 <sup>5</sup>                             |
| <b>H<sub>3</sub>L2</b> | 6.90×10 <sup>5</sup>                                                   | 4.83×10 <sup>5</sup>                             |
| <b>H<sub>3</sub>L3</b> | 1.37×10 <sup>4</sup>                                                   | 1.44×10 <sup>4</sup>                             |
| <b>H<sub>3</sub>L4</b> | 1.03 ×10 <sup>4</sup>                                                  | 1.10 ×10 <sup>4</sup>                            |

**Table S5.** Lifetime, quantum yield, LOD and binding constant values of chemosensors (**H<sub>3</sub>L1-H<sub>3</sub>L4**) and complexes (**1-4**).

|                        | Lifetime (ns)<br>( $\tau_{av.}$ ) | Quantum Yield<br>( $\Phi$ ) | LOD (nM) | Binding Constant<br>( $M^{-1}$ ) |
|------------------------|-----------------------------------|-----------------------------|----------|----------------------------------|
| <b>H<sub>3</sub>L1</b> | 3.95                              | 0.004                       | -        | -                                |
| <b>H<sub>3</sub>L2</b> | 2.56                              | 0.003                       | -        | -                                |
| <b>H<sub>3</sub>L3</b> | 1.58                              | 0.002                       | -        | -                                |
| <b>H<sub>3</sub>L4</b> | 1.06                              | 0.004                       | -        | -                                |
| <b>Complex 1</b>       | 6.80                              | 0.24                        | 1.40     | $8.00 \times 10^5$               |
| <b>Complex 2</b>       | 4.58                              | 0.18                        | 2.50     | $6.90 \times 10^5$               |
| <b>Complex 3</b>       | 4.53                              | 0.13                        | 4.00     | $1.37 \times 10^4$               |
| <b>Complex 4</b>       | 4.38                              | 0.11                        | 5.30     | $1.03 \times 10^4$               |

**Table S6.** Energy (eV) of selected M.O.s of chemosensors (**H<sub>3</sub>L1-H<sub>3</sub>L4**).

|               | <b>H<sub>3</sub>L1</b> | <b>H<sub>3</sub>L2</b> | <b>H<sub>3</sub>L3</b> | <b>H<sub>3</sub>L4</b> |
|---------------|------------------------|------------------------|------------------------|------------------------|
| <b>LUMO+5</b> | -0.49                  | -0.05                  | -0.24                  | 0.03                   |
| <b>LUMO+4</b> | -0.61                  | -0.33                  | -0.4                   | -0.24                  |
| <b>LUMO+3</b> | -0.66                  | -0.39                  | -0.42                  | -0.39                  |
| <b>LUMO+2</b> | -1.03                  | -0.52                  | -0.44                  | -0.41                  |
| <b>LUMO+1</b> | -1.91                  | -0.99                  | -1                     | -1                     |
| <b>LUMO</b>   | -2.99                  | -2.76                  | -1.7                   | -1.7                   |
| <b>HOMO</b>   | -4.82                  | -5.34                  | -5.26                  | -5.26                  |
| <b>HOMO-1</b> | -6.06                  | -5.46                  | -5.37                  | -5.38                  |
| <b>HOMO-2</b> | -6.2                   | -5.96                  | -5.91                  | -5.91                  |
| <b>HOMO-3</b> | -6.57                  | -6.07                  | -6.18                  | -6.23                  |
| <b>HOMO-4</b> | -6.85                  | -6.58                  | -6.52                  | -6.53                  |
| <b>HOMO-5</b> | -6.87                  | -6.85                  | -6.83                  | -6.83                  |

**Table S7.** Electronic transition calculated by TDDFT using B3LYP/CPCM method in water solvent of chemosensors (**H<sub>3</sub>L1-H<sub>3</sub>L4**).

|                        | $E_{\text{excitation}}$ (eV) | $\lambda_{\text{excitation}}$ (nm) | Osc. Strength (f) | Key transition                 |
|------------------------|------------------------------|------------------------------------|-------------------|--------------------------------|
| <b>H<sub>3</sub>L1</b> | 3.48                         | 355                                | 0.0572            | HOMO-2 $\rightarrow$ LUMO(88%) |
|                        | 3.58                         | 345                                | 0.1152            | HOMO-1 $\rightarrow$ LUMO(74%) |
| <b>H<sub>3</sub>L2</b> | 3.49                         | 356                                | 0.0013            | HOMO-2 $\rightarrow$ LUMO(99%) |
|                        | 3.58                         | 345                                | 0.4495            | HOMO-3 $\rightarrow$ LUMO(96%) |
| <b>H<sub>3</sub>L3</b> | 3.12                         | 422                                | 0.0002            | HOMO $\rightarrow$ LUMO(96%)   |
|                        | 3.35                         | 400                                | 0.0025            | HOMO-1 $\rightarrow$ LUMO(95%) |
| <b>H<sub>3</sub>L4</b> | 3.10                         | 420                                | 0.0001            | HOMO $\rightarrow$ LUMO (97%)  |
|                        | 3.35                         | 398                                | 0.0023            | HOMO-1 $\rightarrow$ LUMO(96%) |

**Chart S1.** Literature survey of rhodamine based derivatives used in sensing of Al<sup>3+</sup> ion.

| Sl. No. | Probe                                                                                                                                      | Crystal Structure | Sensing of metal ion(s)               | Excitation(nm)/Emission(nm)   | Sensing Media                                                   | Binding constant                                                                                                                 | Limit of detection (LOD)                                                                    | Biological study | Refs. |
|---------|--------------------------------------------------------------------------------------------------------------------------------------------|-------------------|---------------------------------------|-------------------------------|-----------------------------------------------------------------|----------------------------------------------------------------------------------------------------------------------------------|---------------------------------------------------------------------------------------------|------------------|-------|
| 1.      | pyrazole-based chemosensor (Pry-R6G)                                                                                                       | No                | Al <sup>3+</sup>                      | 532/568                       | (DMF/H <sub>2</sub> O, 1/99, v/v)                               | -                                                                                                                                | 2.61 × 10 <sup>-8</sup> M                                                                   | No               | 44a   |
| 2.      | rhodamine B-2-chloronicotinaldehyde derivative (RBCN)                                                                                      | No                | Al <sup>3+</sup>                      | 560/584                       | CH <sub>3</sub> CN                                              | 2.96 × 10 <sup>-5</sup> M <sup>-1</sup>                                                                                          | 2.86 × 10 <sup>-8</sup> M                                                                   | No               | 44b   |
| 3.      | 3',6'-Bis(diethylamino)-2-(2-isothiocyanatoethyl)spiro-[isoindoline-1,9'-xanthen]-3-one (2)                                                | No                | Al <sup>3+</sup>                      | 554/583                       | CH <sub>3</sub> CN:H <sub>2</sub> O (1:1, v/v)                  | 4.5 × 10 <sup>-4</sup> M <sup>-1</sup>                                                                                           | 1.1 × 10 <sup>-8</sup> M                                                                    | No               | 44c   |
| 4.      | 1,2,3-triazole-ringappended rhodamine dye (L)                                                                                              | No                | Al <sup>3+</sup>                      | 540/577                       | CH <sub>3</sub> OH-H <sub>2</sub> O, 9:1 (v/v)                  | 2.55 × 10 <sup>4</sup> M <sup>-1</sup>                                                                                           | -                                                                                           | No               | 44d   |
| 5.      | 2-(2-((3-(tert-butyl)-2-hydroxybenzylidene)-amino)ethyl)-3'-6'-bis(ethylamino)-2',7'-dimethylspiro-[indoline-1,9'-xanthen]-3-one (HL-t-Bu) | Yes               | Al <sup>3+</sup> and Zn <sup>2+</sup> | 500/550<br>370/457            | 10 mM HEPES buffer (methanol/water mixture) (9:1, pH = 7.4)     | 9.38 × 10 <sup>3</sup> M <sup>-1</sup><br>and<br>4.75 × 10 <sup>4</sup> M <sup>-1</sup>                                          | 10.98 × 10 <sup>-9</sup> M and<br>76.92 × 10 <sup>-9</sup> M                                | Yes              | 44e   |
| 6.      | 3', 6'- bis(diethylamino)-2-(2-((2-hydroxybenzylidene)amino)phenylthio)ethyl) spiro[isoindoline 1,9' xanthen]-3-one (L)                    | Yes               | Al <sup>3+</sup> and Hg <sup>2+</sup> | 388/485<br>525/585            | HEPES-buffered (20 mM, MeOH/H <sub>2</sub> O, 4/1, v/v, pH 7.4) | 4.66 × 10 <sup>6</sup> M <sup>-1</sup><br>-                                                                                      | 0.005 × 10 <sup>-6</sup> M and<br>0.05 × 10 <sup>-6</sup> M                                 | Yes              | 44f   |
| 7.      | (3-(3,5-dimethyl-pyrazol-1-ylmethyl)-2-hydroxy-5-methyl-benzaldehyde (HL <sup>5</sup> ))                                                   | No                | Al, Fe and Cr                         | 510/555<br>510/555<br>510/555 | methanol/H <sub>2</sub> O (1 : 1, v/v, pH 7.2)                  | 8.2 × 10 <sup>4</sup> M <sup>-1</sup> ,<br>6.7 × 10 <sup>4</sup> M <sup>-1</sup><br>and<br>6.0 × 10 <sup>4</sup> M <sup>-1</sup> | 0.34 × 10 <sup>-6</sup> M,<br>0.29 × 10 <sup>-6</sup> M<br>and<br>0.31 × 10 <sup>-6</sup> M | Yes              | 44g   |
| 8.      | rhodamine-based derivative (L)                                                                                                             | Yes               | Al <sup>3+</sup>                      | 500/556                       | H <sub>2</sub> O-EtOH (4 : 1, v/v)                              | 3.14 × 10 <sup>5</sup> M <sup>-1</sup>                                                                                           | 3.26 × 10 <sup>-6</sup> M                                                                   | Yes              | 44h   |
| 9.      | (E)-3',6'-bis(diethylamino)-2-(2-(pyren-4-ylmethyleneamino)ethyl)spiro[isoindoline-1,9'-xanthen]-3-one (L)                                 | Yes               | Al <sup>3+</sup>                      | 400/586                       | HEPES buffer (0.1 M; EtOH-H <sub>2</sub> O, 4 : 1 v/v; pH 7.4)  | 1.19 × 10 <sup>4</sup> M <sup>-1</sup>                                                                                           | 0.02 × 10 <sup>-6</sup> M                                                                   | Yes              | 44i   |
| 10.     | 3',6'-bis(ethylamino)-2-(2-(2-hydroxy-5-methylbenzylideneamino)ethyl)-2',7'-dimethylspiro[isoindoline-1,9'-xanthen]-3-one (HL-Me)          | Yes               | Al <sup>3+</sup>                      | 500/552                       | 10 mM HEPES buffer, pH 7.4, H <sub>2</sub> O/MeOH = 1 : 9 (v/v) | 2.05 × 10 <sup>5</sup> M <sup>-1</sup>                                                                                           | 2.8 × 10 <sup>-9</sup> M                                                                    | Yes              | 44j   |

|     |                                                                                                                                               |     |                  |         |                                                               |                                        |                            |     |                  |
|-----|-----------------------------------------------------------------------------------------------------------------------------------------------|-----|------------------|---------|---------------------------------------------------------------|----------------------------------------|----------------------------|-----|------------------|
| 11. | <b>rhodamine Schiff base (L)</b>                                                                                                              | Yes | Al <sup>3+</sup> | 525/590 | HEPES buffer (1 mM, pH 7.4; EtOH-water, 1 : 3 v/v)            | 8.13 × 10 <sup>4</sup> M <sup>-1</sup> | 60 × 10 <sup>-9</sup> M    | Yes | <b>44k</b>       |
| 12. | <b>Rhodamine-diformyl p-cresol conjugate (L)</b>                                                                                              | No  | Al <sup>3+</sup> | 460/585 | HEPES-buffered (0.1 M) EtOH:water (4:1, v/v), pH 7.4          | 9.1 × 10 <sup>6</sup> M <sup>-2</sup>  | 5 × 10 <sup>-9</sup> M     | Yes | <b>44l</b>       |
| 13. | <b>2-((3,5-dibromo-2-hydroxybenzylidene)amino)-3',6'-bis(ethylamino)-2',7'-dimethylspiro[isindoline-1,9'-xanthen]-3-one, (HL1)</b>            | Yes | Al <sup>3+</sup> | 490/555 | 10 mM HEPES buffer, pH 7.4, (H <sub>2</sub> O/MeOH) (9:1 v/v) | 8.00 × 10 <sup>5</sup> M <sup>-1</sup> | 2.50 × 10 <sup>-9</sup> M  | Yes | <b>This Work</b> |
| 14. | <b>2-((3,5-dichloro-2-hydroxybenzylidene)amino)-3',6'-bis(ethylamino)-2',7'-dimethylspiro[isindoline-1,9'-xanthen]-3-one, (HL2)</b>           | Yes | Al <sup>3+</sup> | 490/555 | 10 mM HEPES buffer, pH 7.4, (H <sub>2</sub> O/MeOH) (9:1 v/v) | 6.90 × 10 <sup>5</sup> M <sup>-1</sup> | 1.40 × 10 <sup>-9</sup> M  | Yes | <b>This Work</b> |
| 15. | <b>2-(3-((3,5-dibromo-2-hydroxybenzylidene)amino)propyl)-3',6'-bis(ethylamino)-2',7'-dimethylspiro[isindoline-1,9'-xanthen]-3-one, (HL3)</b>  | Yes | Al <sup>3+</sup> | 490/555 | 10 mM HEPES buffer, pH 7.4, (H <sub>2</sub> O/MeOH) (9:1 v/v) | 1.37 × 10 <sup>4</sup> M <sup>-1</sup> | 0.053 × 10 <sup>-9</sup> M | Yes | <b>This Work</b> |
| 16. | <b>2-(3-((3,5-dichloro-2-hydroxybenzylidene)amino)propyl)-3',6'-bis(ethylamino)-2',7'-dimethylspiro[isindoline-1,9'-xanthen]-3-one, (HL4)</b> | Yes | Al <sup>3+</sup> | 490/555 | 10 mM HEPES buffer, pH 7.4, (H <sub>2</sub> O/MeOH) (9:1 v/v) | 1.03 × 10 <sup>4</sup> M <sup>-1</sup> | 0.040 × 10 <sup>-9</sup> M | Yes | <b>This Work</b> |
